# Supplementary material for: The characterisation of commercial 2D carbons: graphene, graphene oxide and reduced graphene oxide
Source: Royal Society of Chemistry journal article supplement (doi:10.1039/d1ma01023a), 2022-01-01
Supplement: d1ma01023a2.pdf [file d1ma01023a2.pdf]

Electronic Supplementary Information  
for:

**The characterisation of commercial 2D carbons: graphene, graphene oxide  
and reduced graphene oxide.**

Peter W. Albers,<sup>a</sup> Valeri Leich,<sup>b</sup> Anibal J. Ramirez-Cuesta,<sup>c</sup> Yongqiang Cheng,<sup>c</sup> Jonas Höning,<sup>d</sup>  
Stewart F. Parker<sup>e,f\*</sup>

<sup>a</sup>Evonik Technology & Infrastructure GmbH, 915 D115, Rodenbacher Chaussee 4. 63457 Hanau-  
Wolfgang, Germany

<sup>b</sup>Evonik Operations GmbH - Creavis, Paul-Baumann-Straße 1, 45772 Marl, Germany

<sup>c</sup>Neutron Scattering Division, Oak Ridge National Laboratory, Oak Ridge Tennessee 37831, United  
States

<sup>d</sup>Evonik Operations GmbH, Kirschenallee, 64293 Darmstadt, Germany

<sup>e</sup>ISIS Pulsed Neutron and Muon Source, STFC Rutherford Appleton Laboratory, Chilton, OX11 0QX,  
UK

<sup>f</sup>School of Chemistry, Joseph Black Building, University of Glasgow, Glasgow, G12 8QQ, UK

\*Corresponding author. Email: [stewart.parker@stfc.ac.uk](mailto:stewart.parker@stfc.ac.uk)

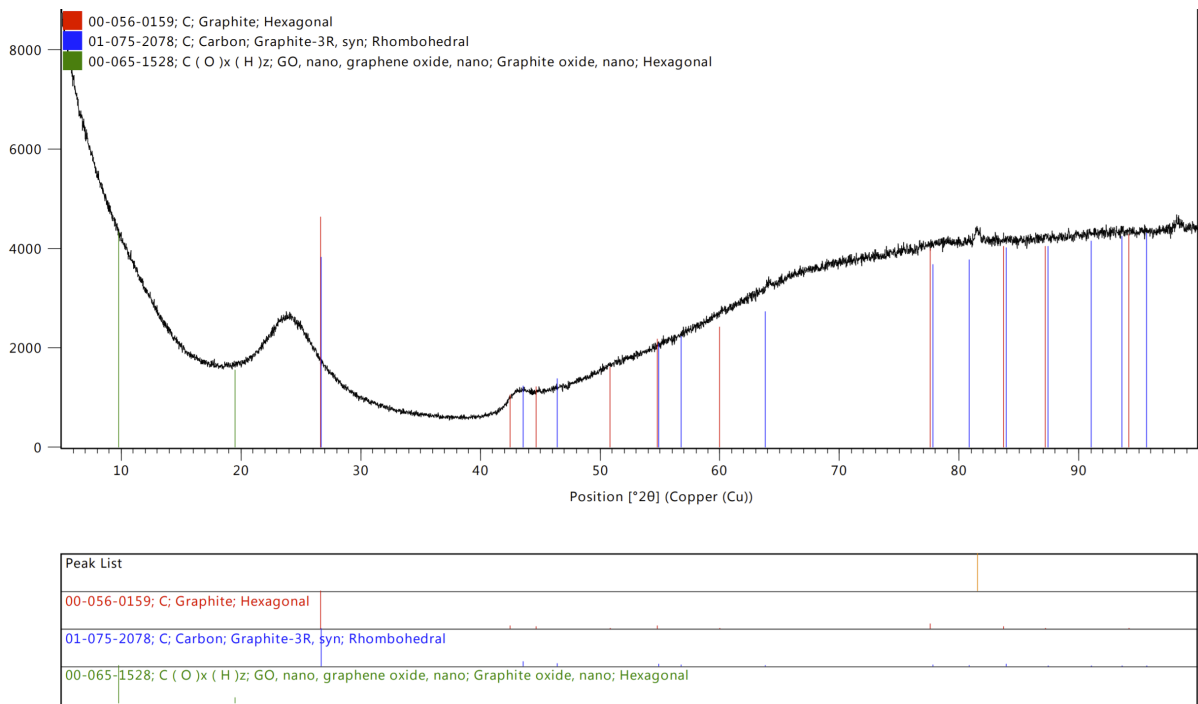

**Fig. S1.** XRD fit for 1\_GO

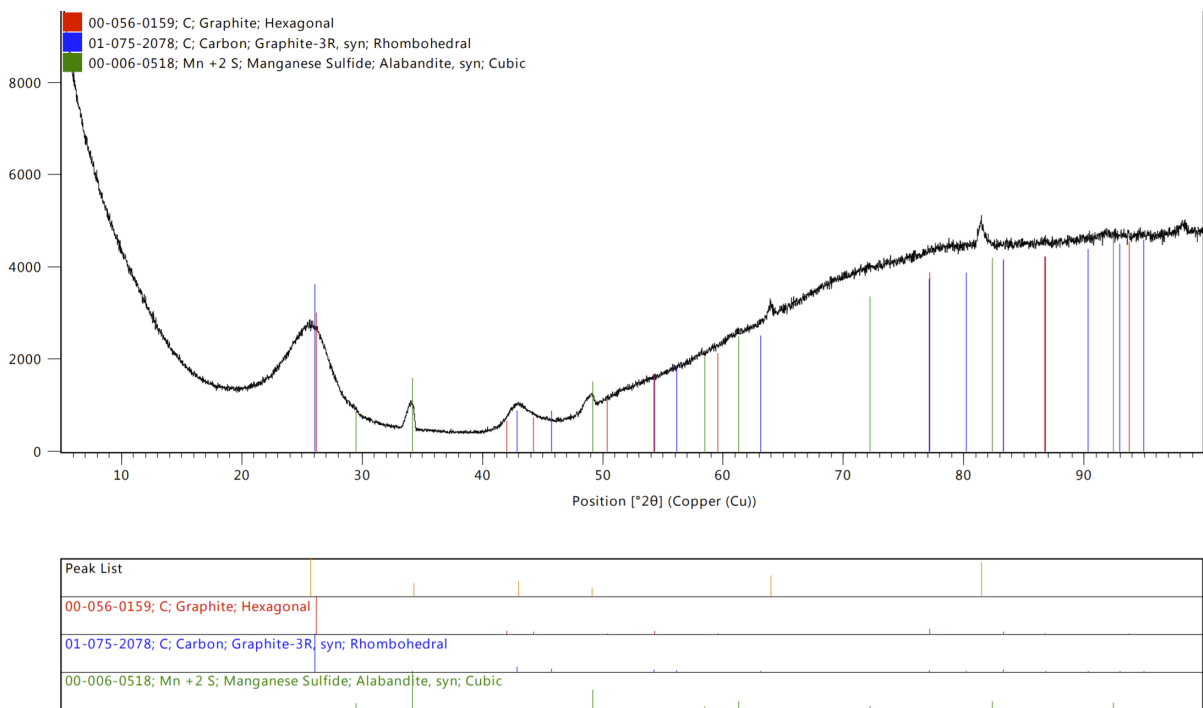

**Fig. S2.** XRD fit for 2\_rGO

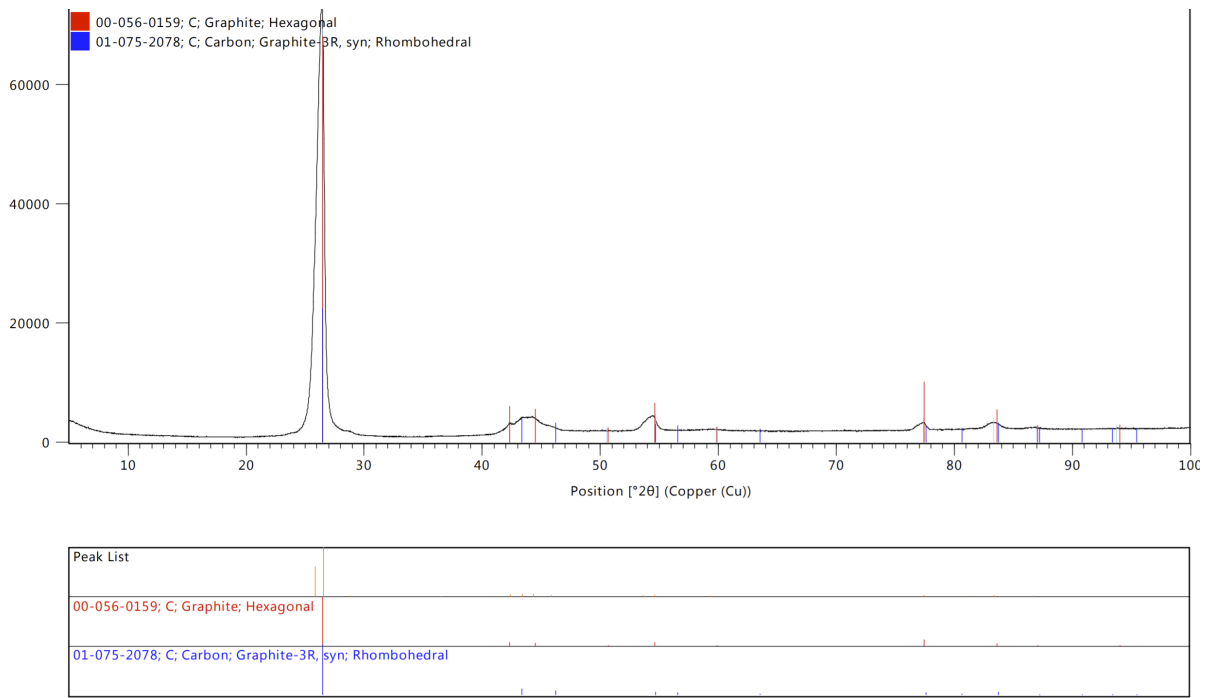

**Fig. S3.** XRD fit for 3\_GNP

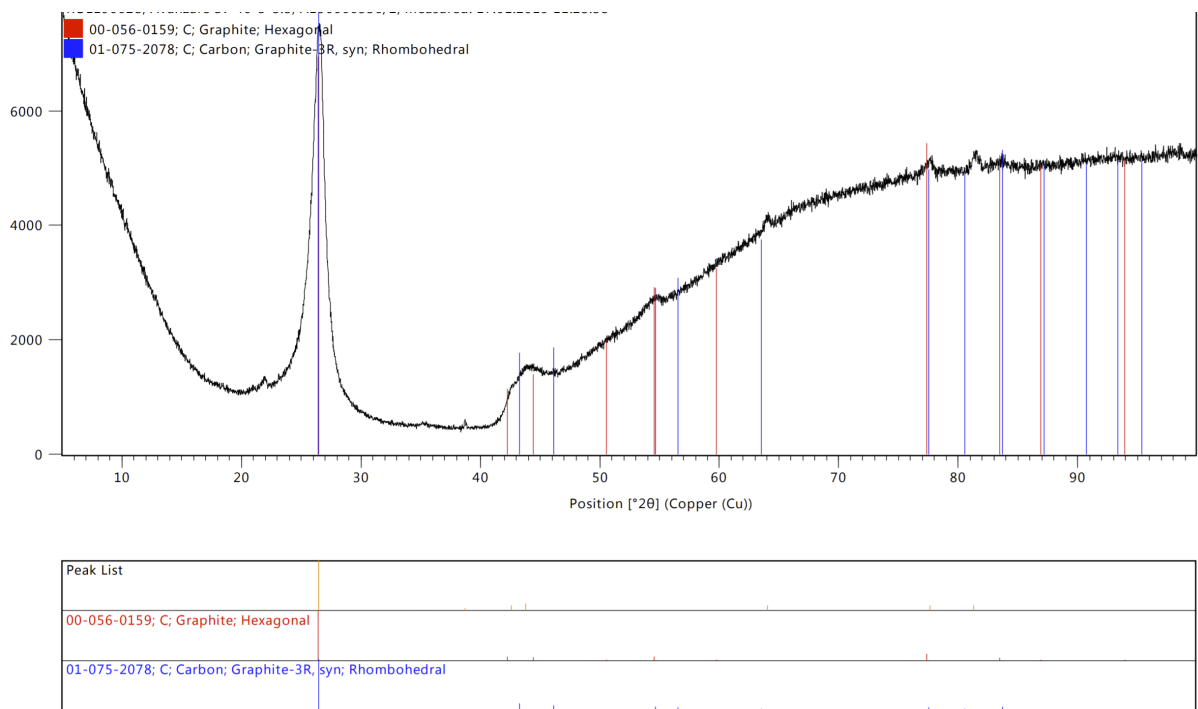

**Fig. S4.** XRD fit for 4\_rGO

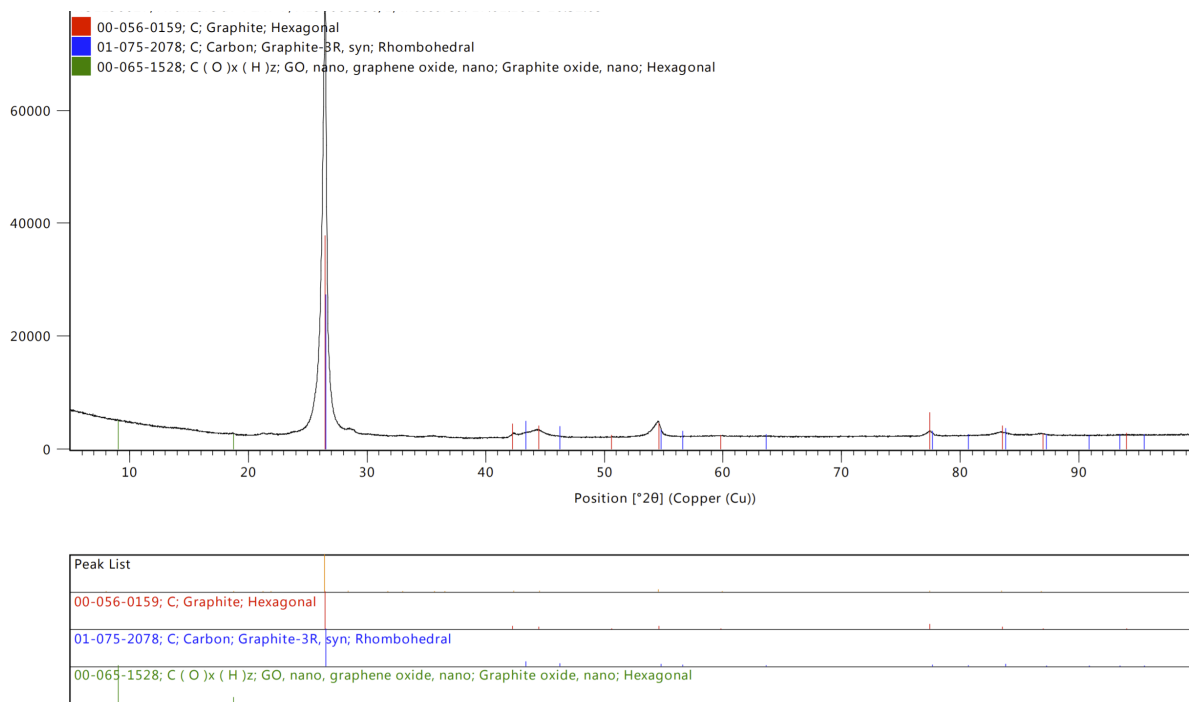

**Fig. S5.** XRD fit for 5\_GNP

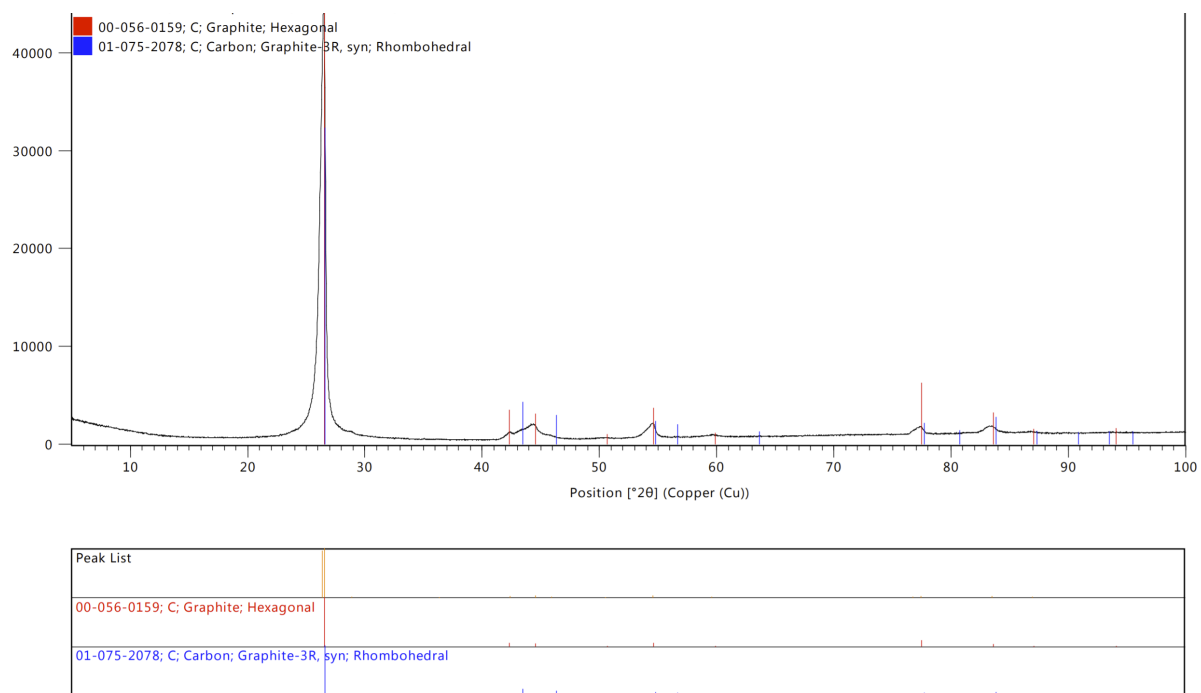

**Fig. S6.** XRD fit for 6\_GNP



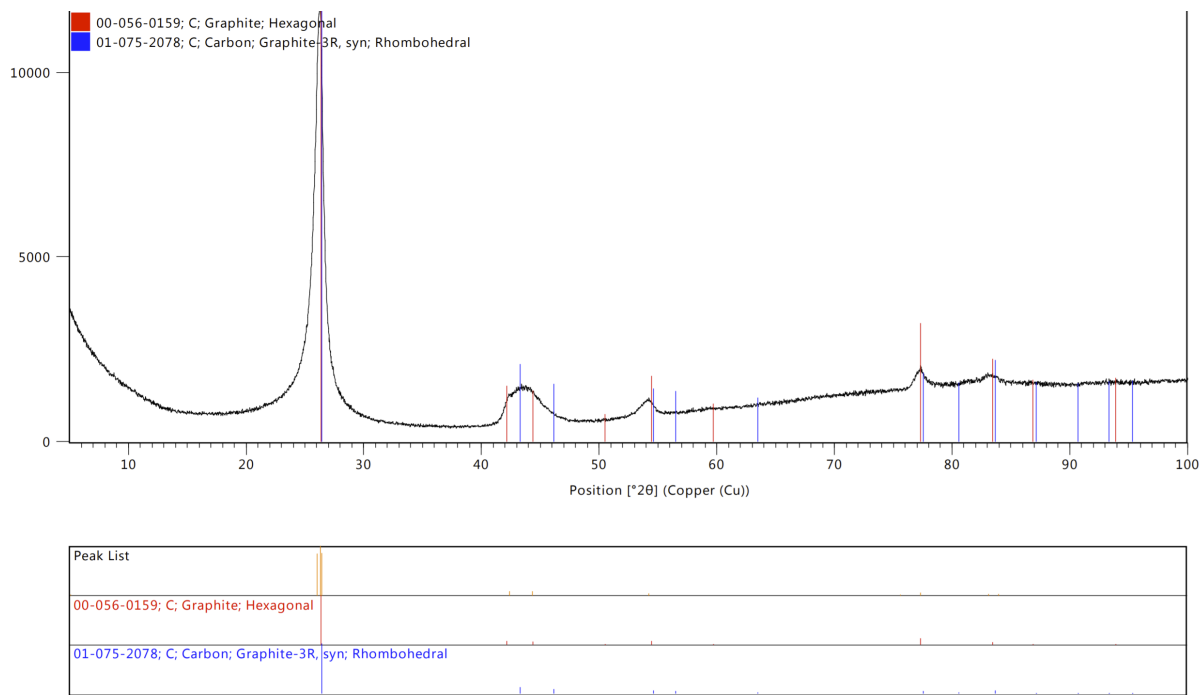

**Fig. S7.** XRD fit for 7\_GO

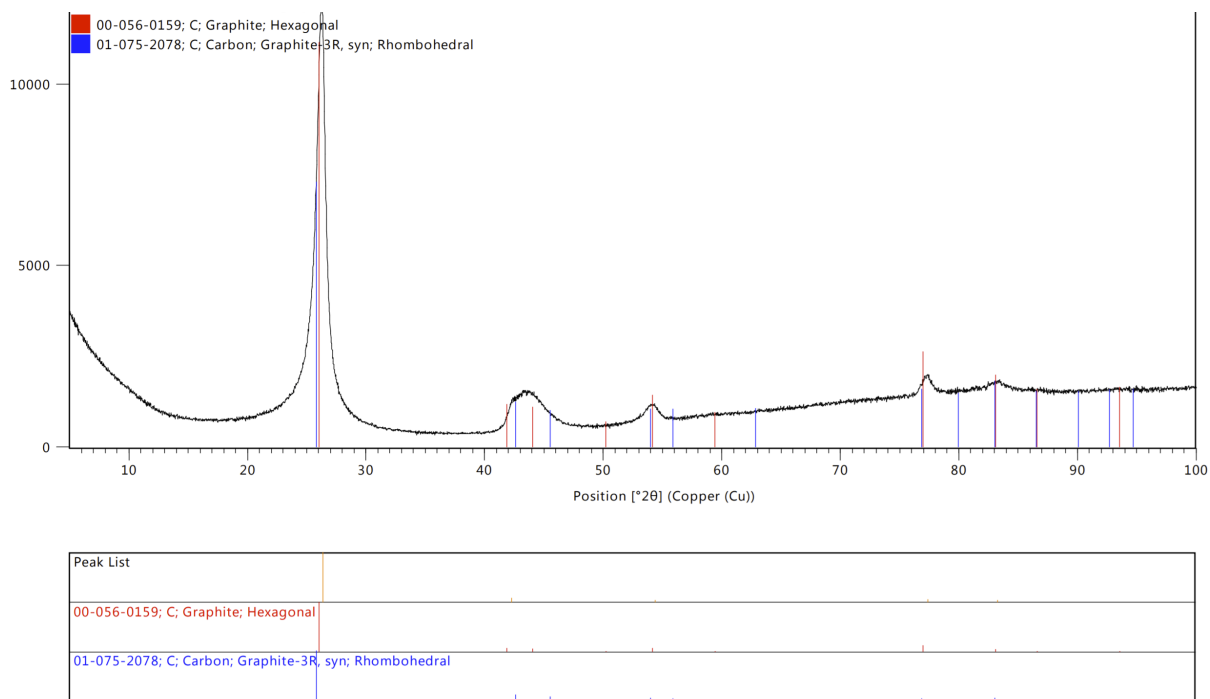

**Fig. S8.** XRD fit for 8\_rGO

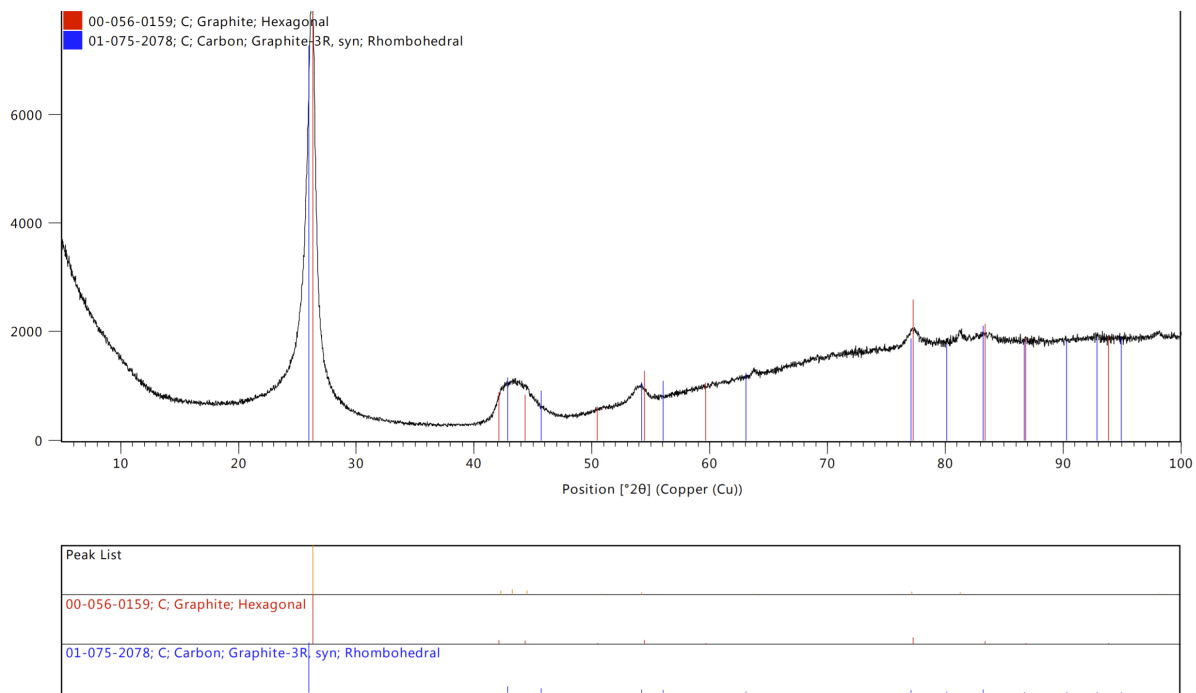

**Fig. S9.** XRD fit for 9\_GNP

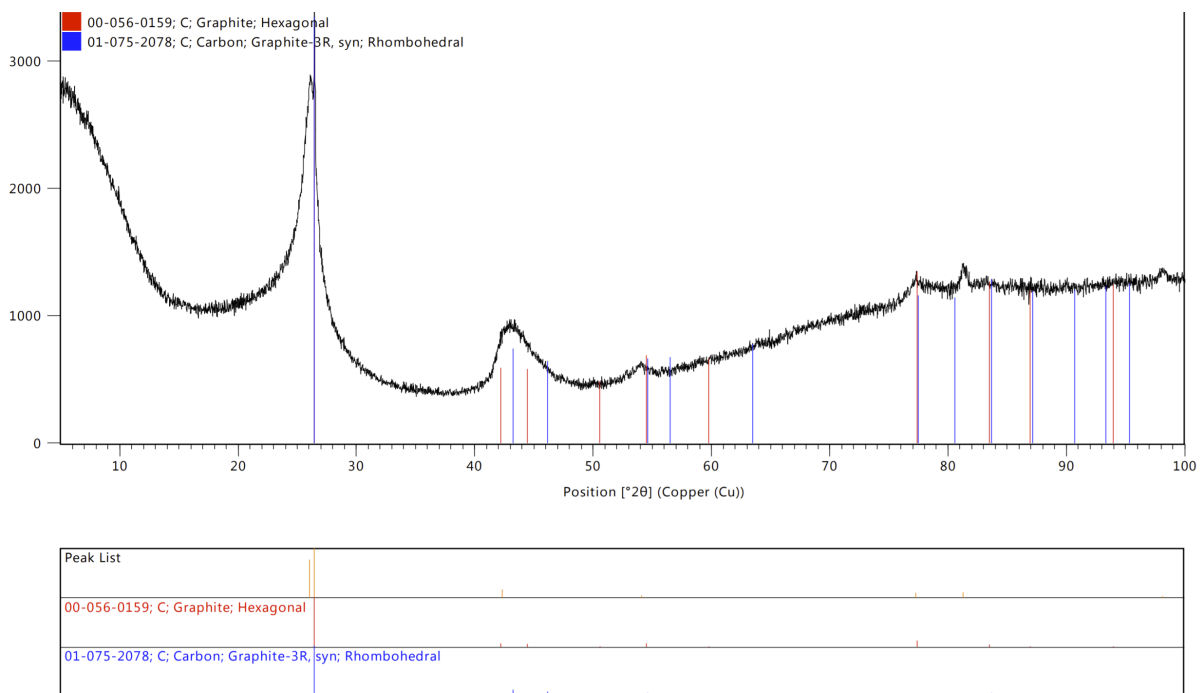

**Fig. S10.** XRD fit for 10\_GO

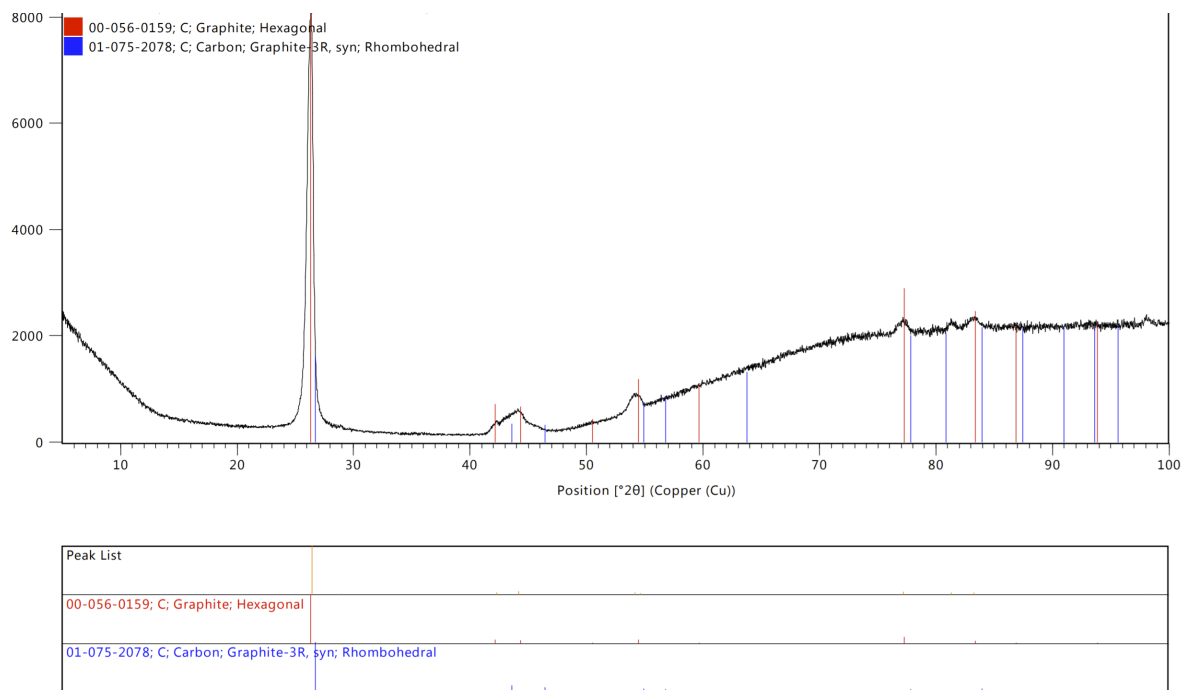

**Fig. S11.** XRD fit for 11\_GNP

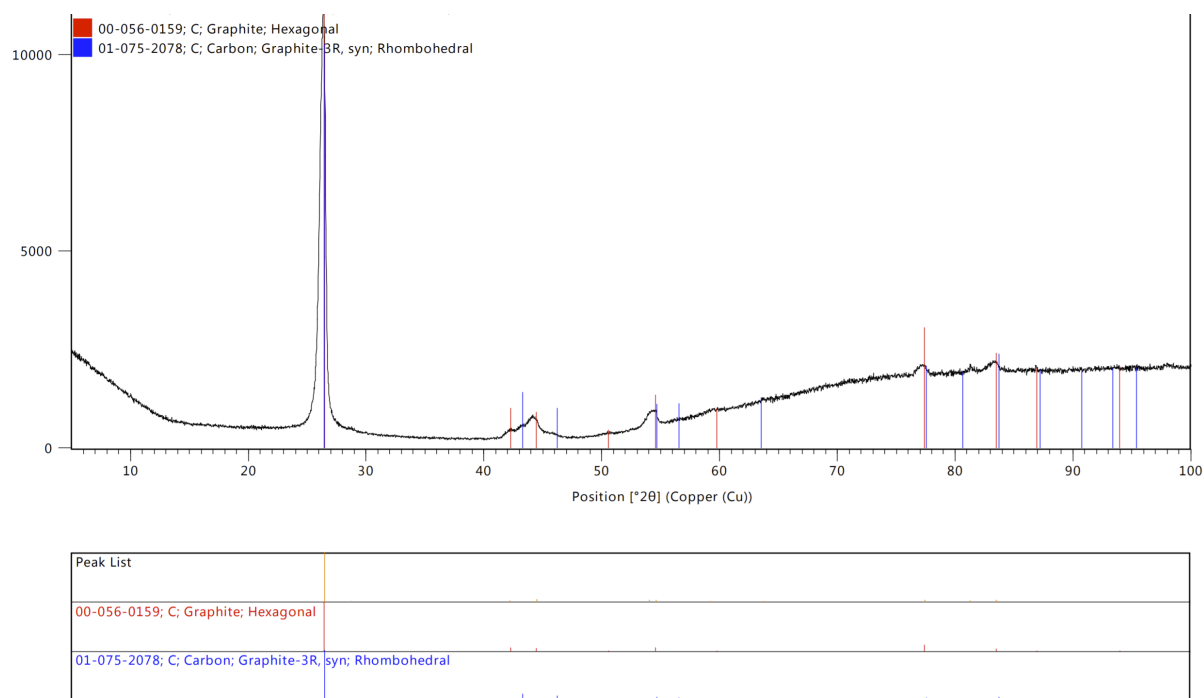

**Fig. S12.** XRD fit for 12\_GNP

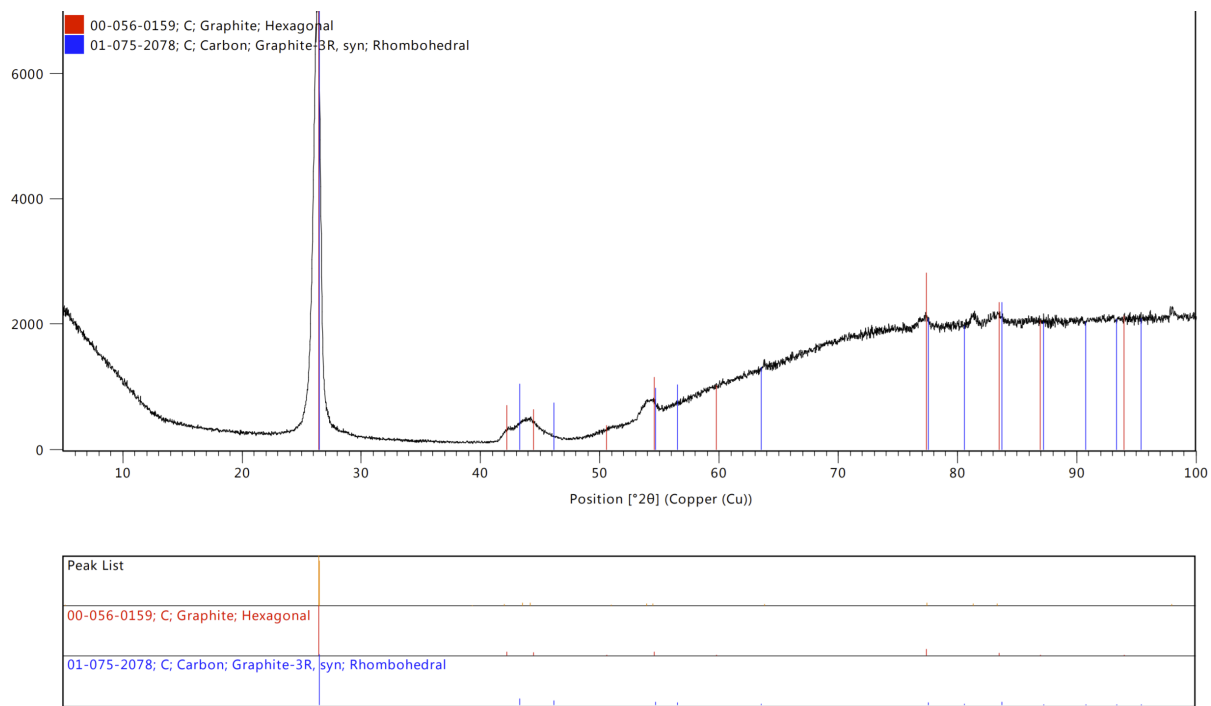

**Fig. S13.** XRD fit for 13\_GNP

3\_GNP

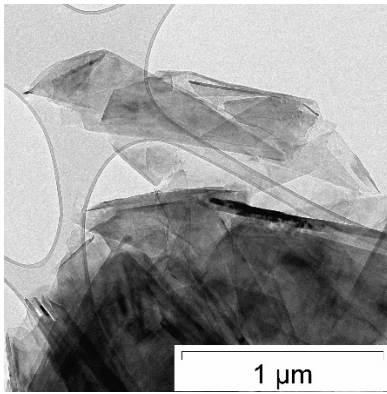

9\_GNP

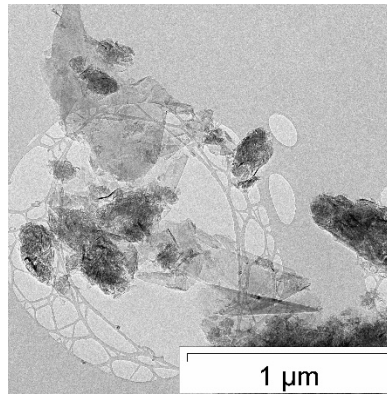

13\_GNP

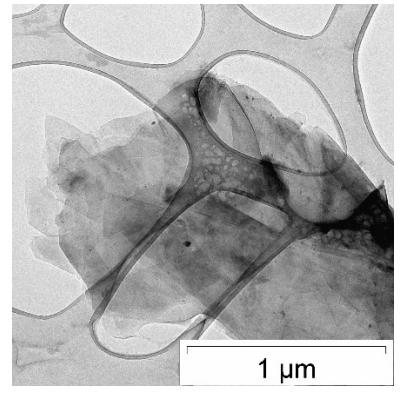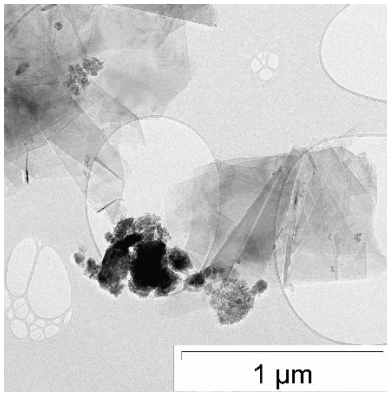

11\_GNP

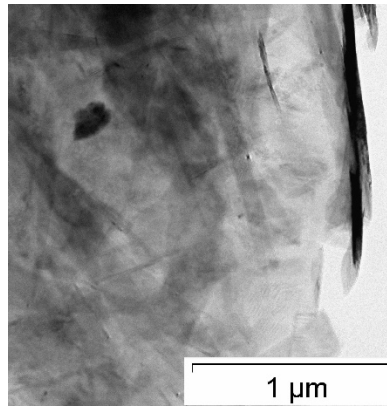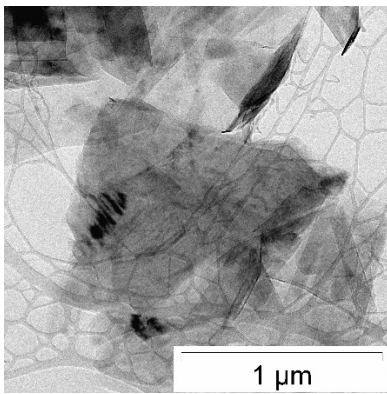

12\_GNP

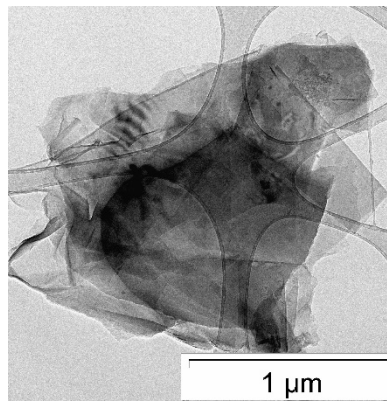

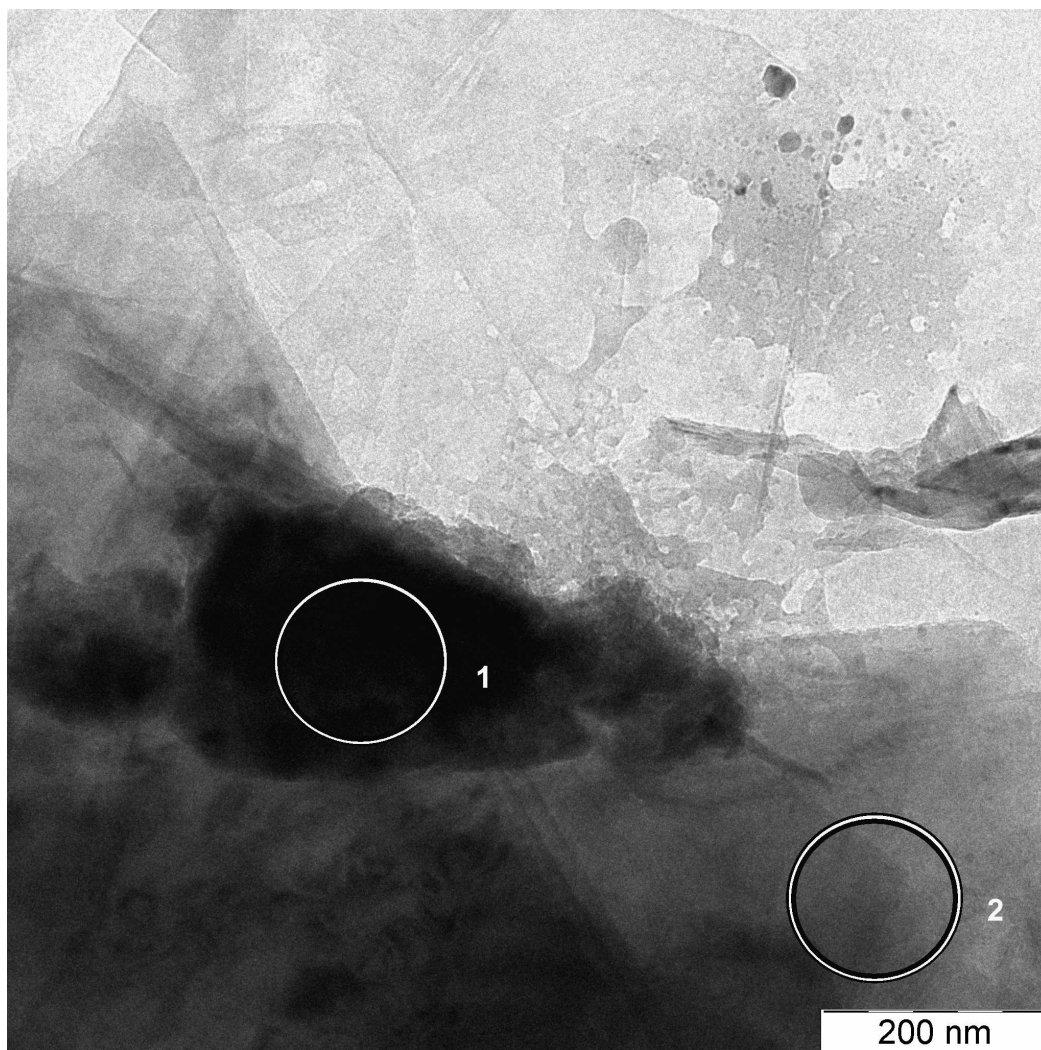

**Fig. S15.** 200 keV TEM image of a 2D carbon.

**Table S1**  
EDX spot analyses in the TEM Jeol 2010F areas analysed marked by circles in Fig. S2.

| Element | Area 1 |       | Area 2 |       |
|---------|--------|-------|--------|-------|
|         | Wt.%   | At.%  | Wt.%   | At.%  |
| C       | 62.18  | 79.23 | 88.75  | 92.90 |
| O       | 10.83  | 10.36 | 6.83   | 5.36  |
| Na      | 0.86   | 0.57  | 0.33   | 0.18  |
| Mg      | 0.38   | 0.24  |        |       |
| Al      | 1.72   | 0.98  |        |       |
| Si      | 5.56   | 3.03  | 0.14   | 0.06  |
| S       | 0.50   | 0.24  | 3.11   | 1.22  |
| Cl      | 0.46   | 0.20  | 0.48   | 0.17  |
| K       | 0.32   | 0.12  | 0.14   | 0.04  |
| Ca      | 2.83   | 1.08  |        |       |
| Cr      | 1.63   | 0.48  |        |       |
| Mn      | 0.27   | 0.08  |        |       |
| Fe      | 11.13  | 3.05  | 0.21   | 0.05  |
| Ni      | 1.33   | 0.35  |        |       |

**A**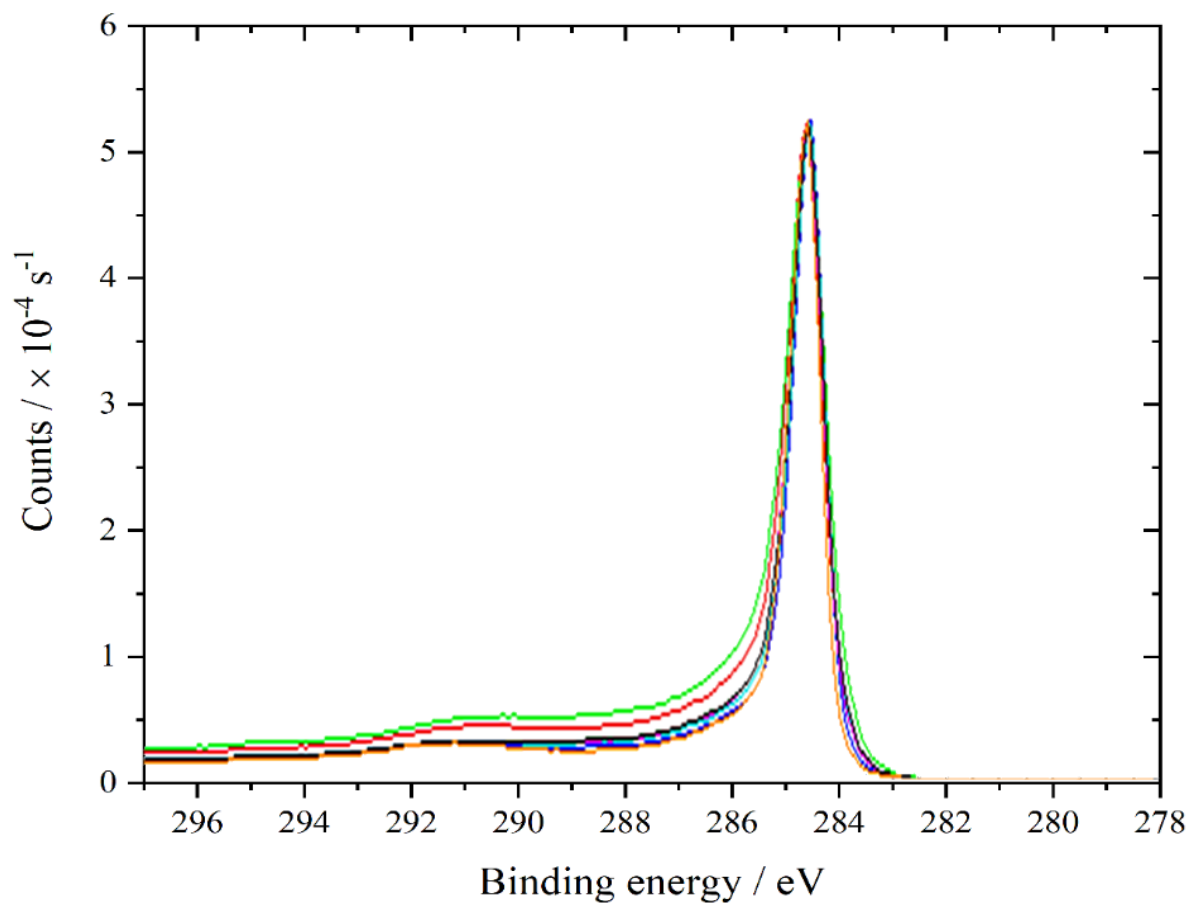**B**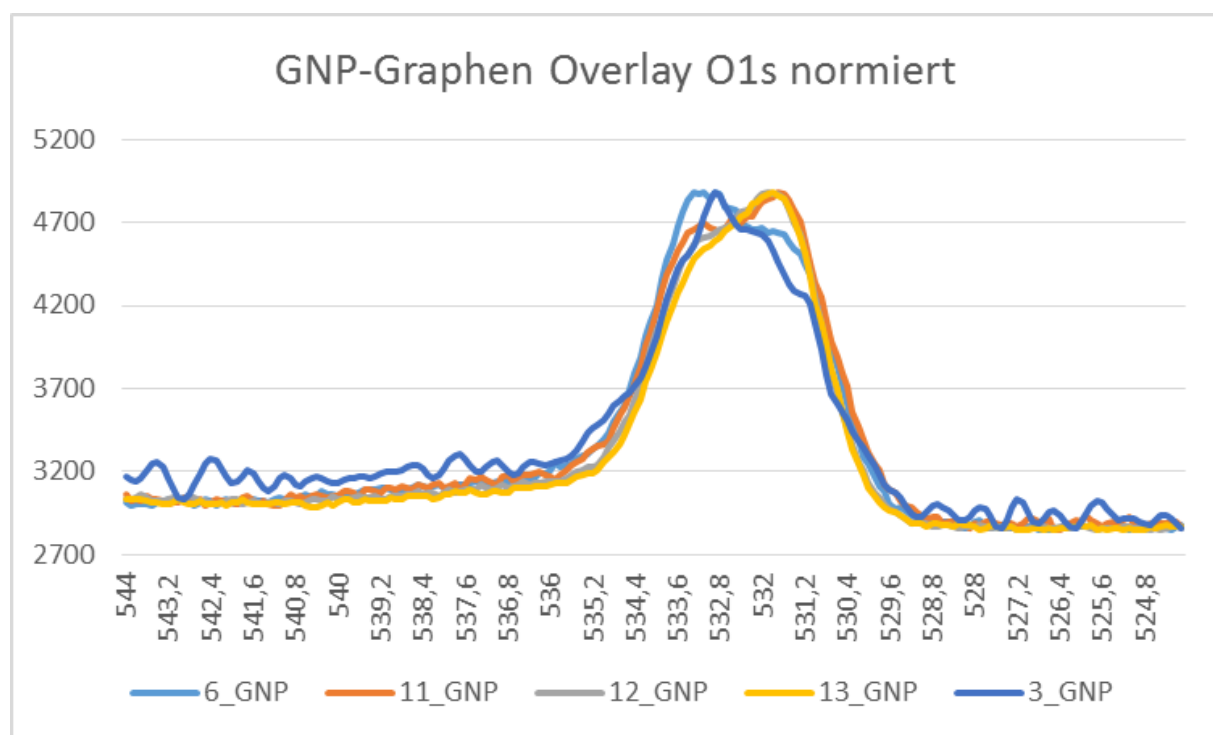

**C**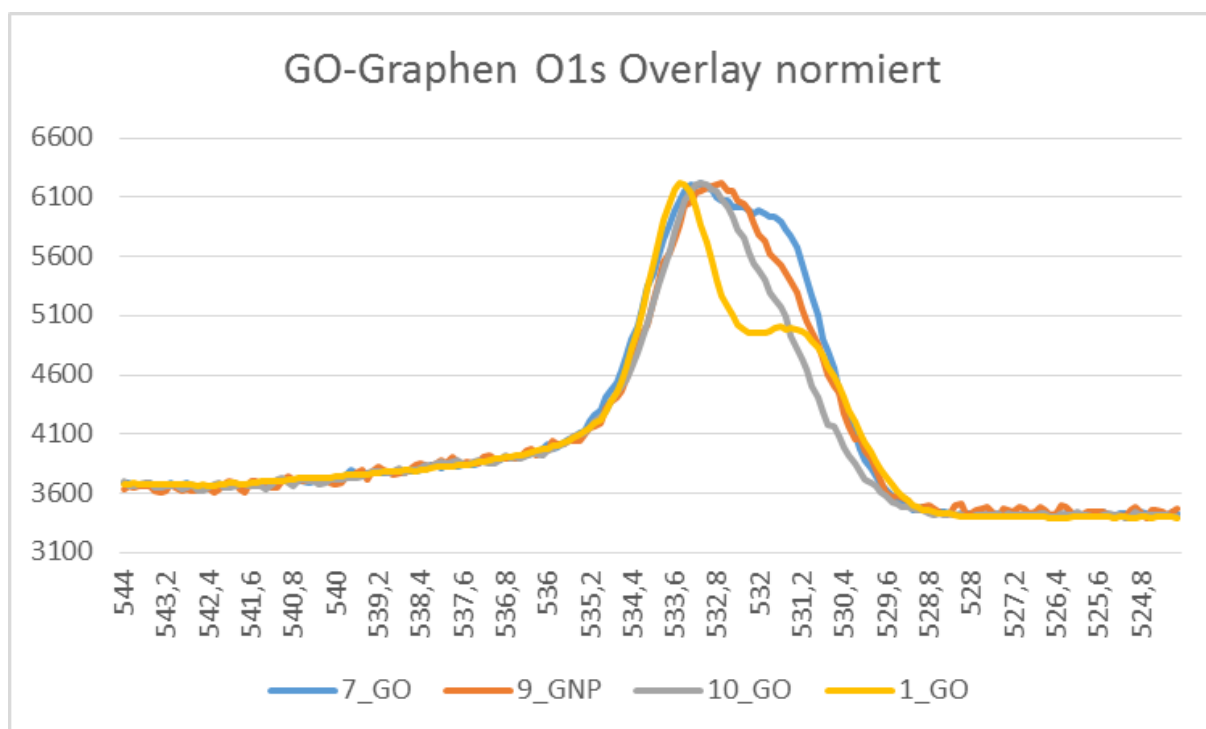**D**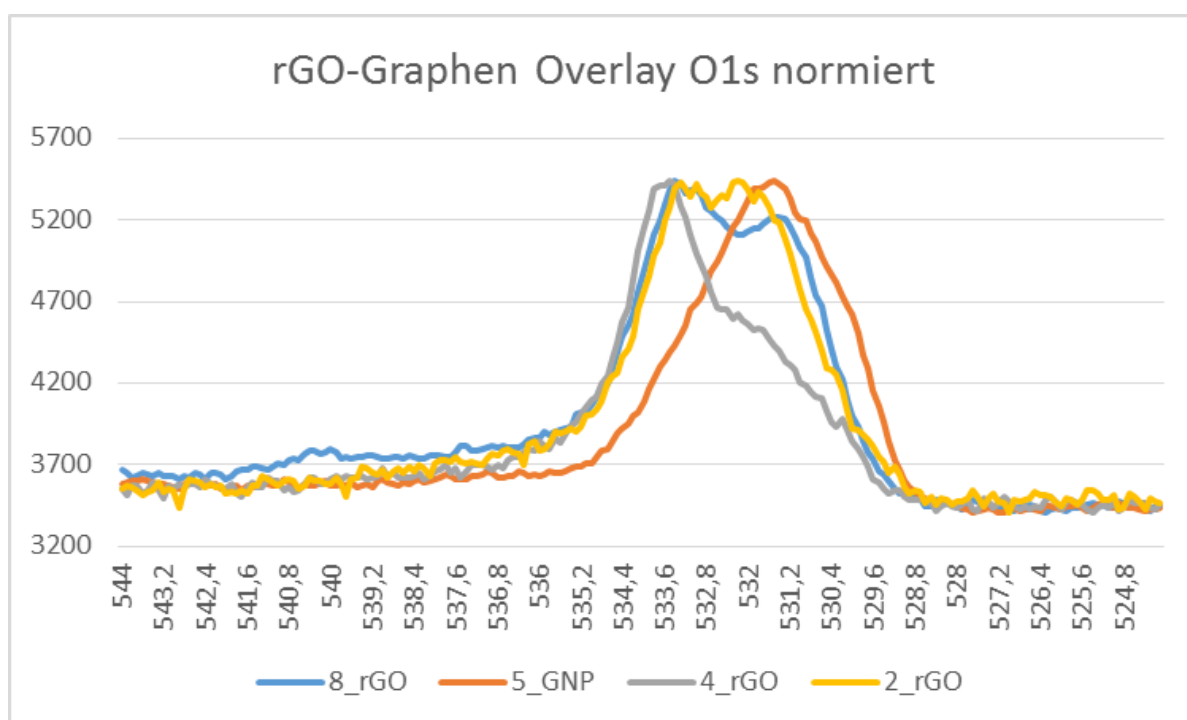

**Fig. S16.** A: Representative O1s XPS spectra of the GNP samples. B-D: Normalised to the largest peak, O1s XPS spectra of the 2D carbon samples.



**Table S2**

Previous data [1] on 3D carbons, spherical aggregates/agglomerates of commercial carbon blacks before and after oxidizing aftertreatment. In a separate oxidation experiment on gb original, after moderate post-oxidation with O<sub>3</sub>, XPS revealed an increase in surface-oxygen from 1.45 to 13.5%.

| Carbon black, oxidation treatment <sup>a</sup> | H / wt.% | BET / m <sup>2</sup> g <sup>-1</sup> | XPS O / at.% | XPS O1s C–OH/C=O |
|------------------------------------------------|----------|--------------------------------------|--------------|------------------|
| ac original                                    | 0.018    | 40                                   | 0.04         | ?                |
| lb original                                    | 0.265    | 20                                   | 0.3          | 2.2              |
| fb original                                    | 0.33     | 120                                  | 0.7          | 6.6              |
| fb HNO <sub>3</sub>                            | 0.26     | ca. 140                              | 9.8          | 2.2              |
| gb original                                    | 0.37     | 360                                  | 1.45         | 1.4              |
| gb NO <sub>2</sub>                             | 0.35     | ca. 460                              | 8.5          | 2.7              |
| gb NO <sub>2</sub>                             | 0.38     | “                                    | 9.1          | 2.2              |
| gb NO <sub>2</sub>                             | 0.44     | “                                    | 11.8         | 2.2              |
| gb HNO <sub>3</sub>                            | 0.32     | “                                    | 10.5         | 4.3              |
| gb O <sub>3</sub>                              | 0.53     | “                                    | 19.3         | 1.6              |

<sup>a</sup>fb: furnace black, gb: gas black, lb: lamp black (all Degussa-Hüls), ac: acetylene black (Denka Black).

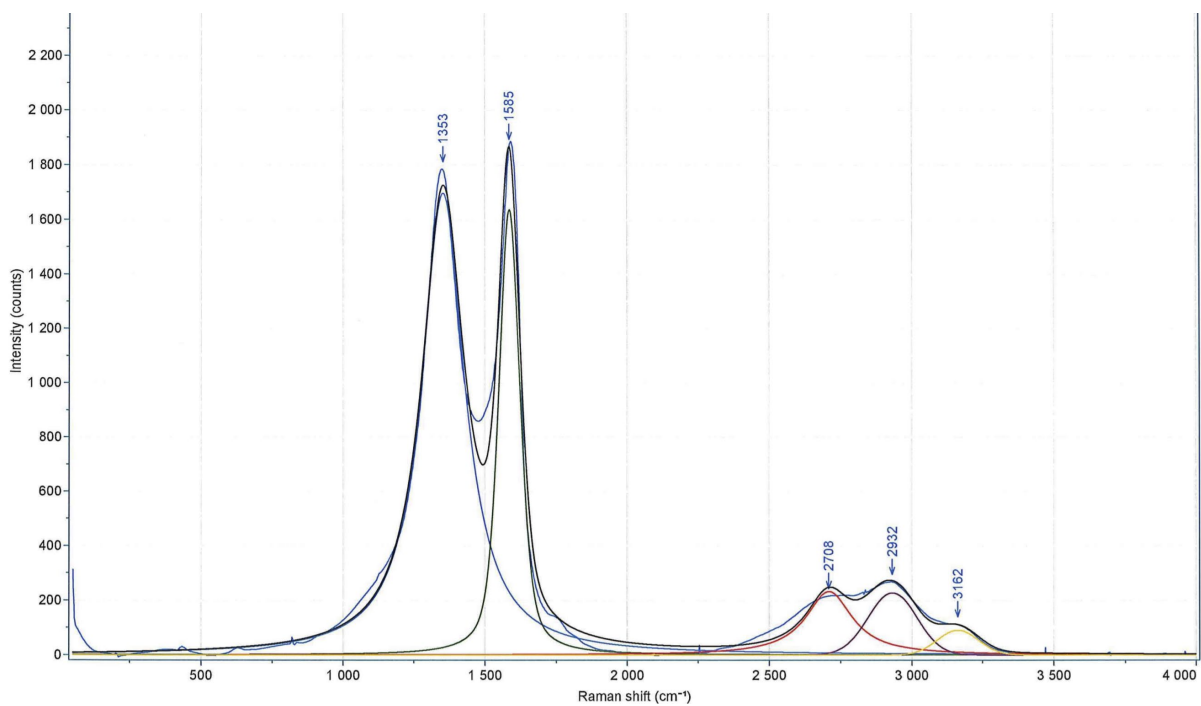

**Fig. S17.** Raman spectrum for 1\_GO

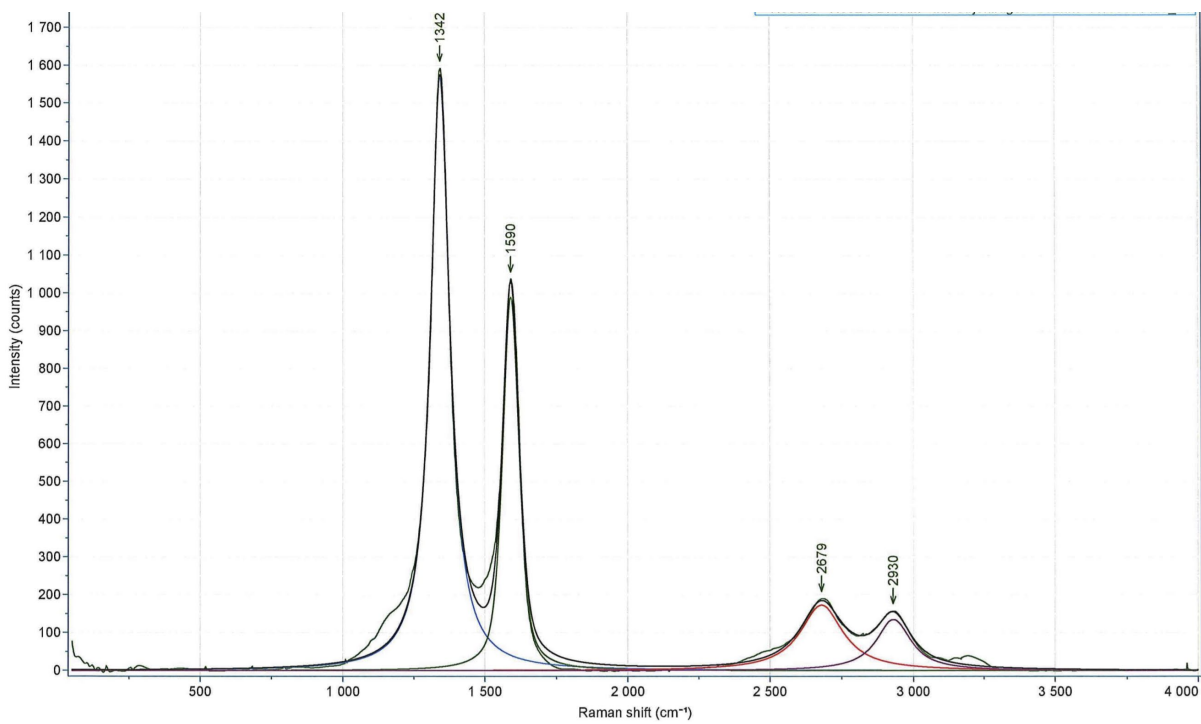

**Fig. S18.** Raman spectrum for 2\_rGO

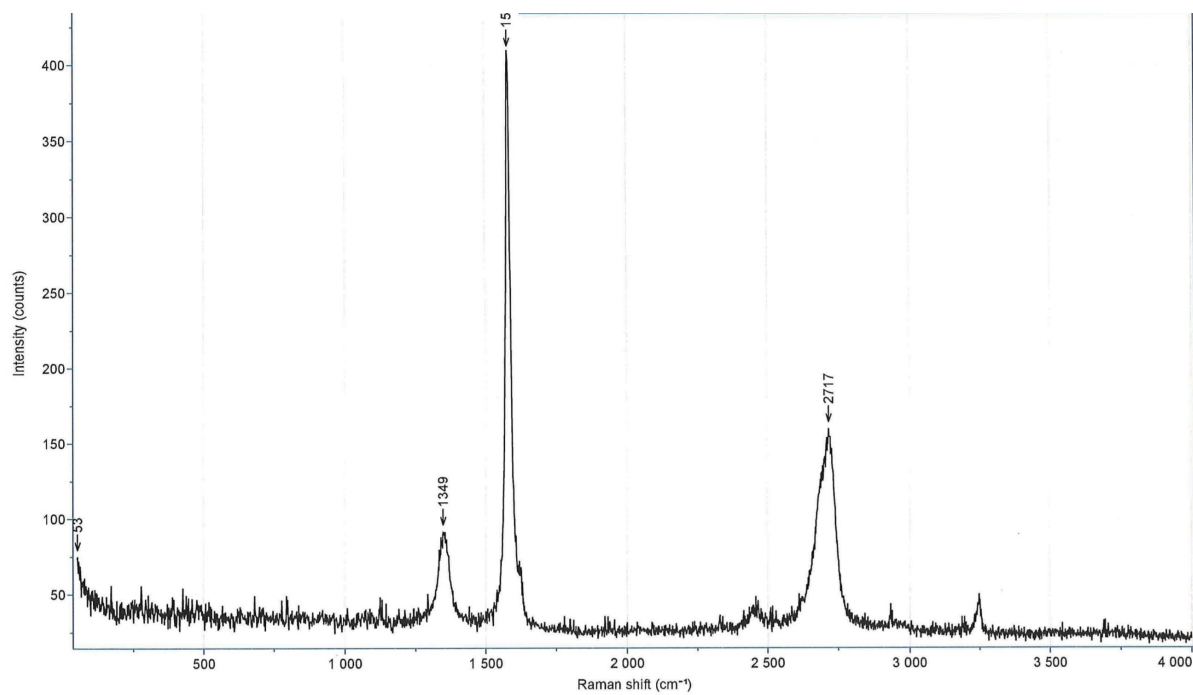

**Fig. S19.** Raman spectrum for 3\_GNP

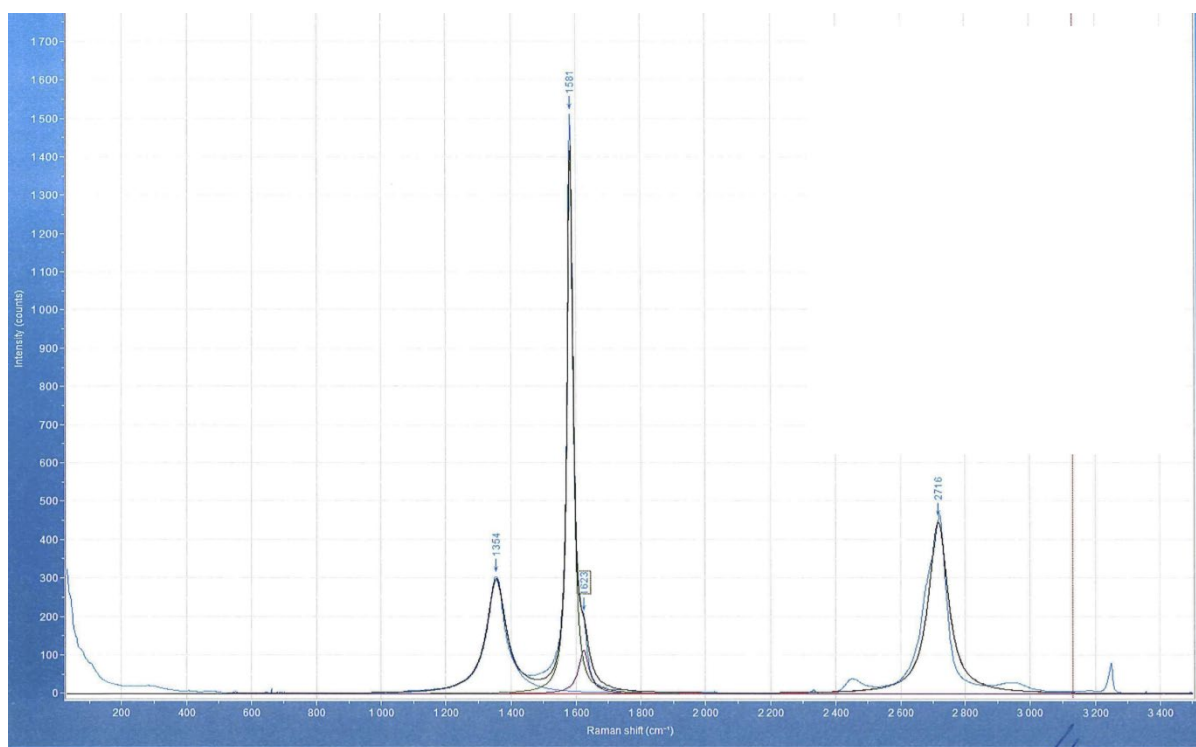

**Fig. S20.** Raman spectrum for 4\_rGO. Note: annotations intended for in-house use have been removed. We emphasise that it is only the annotations that were removed, the spectra themselves have not been altered in any way.

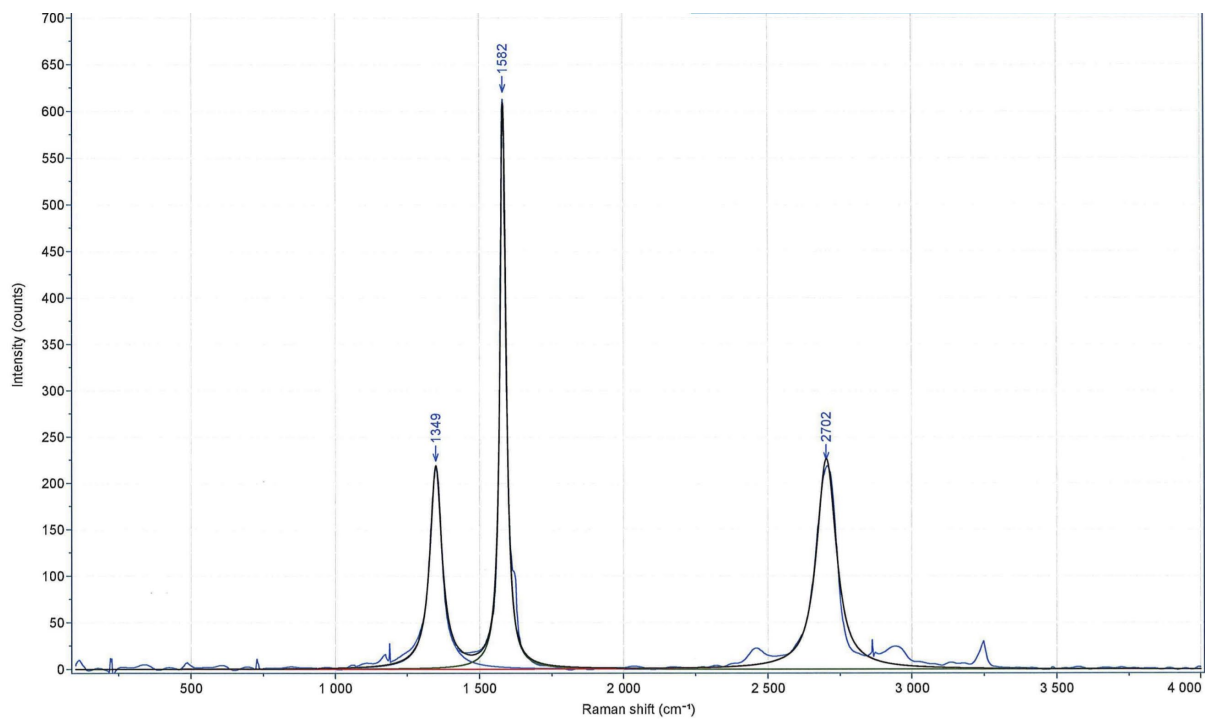

**Fig. S21.** Raman spectrum for 5\_GNP

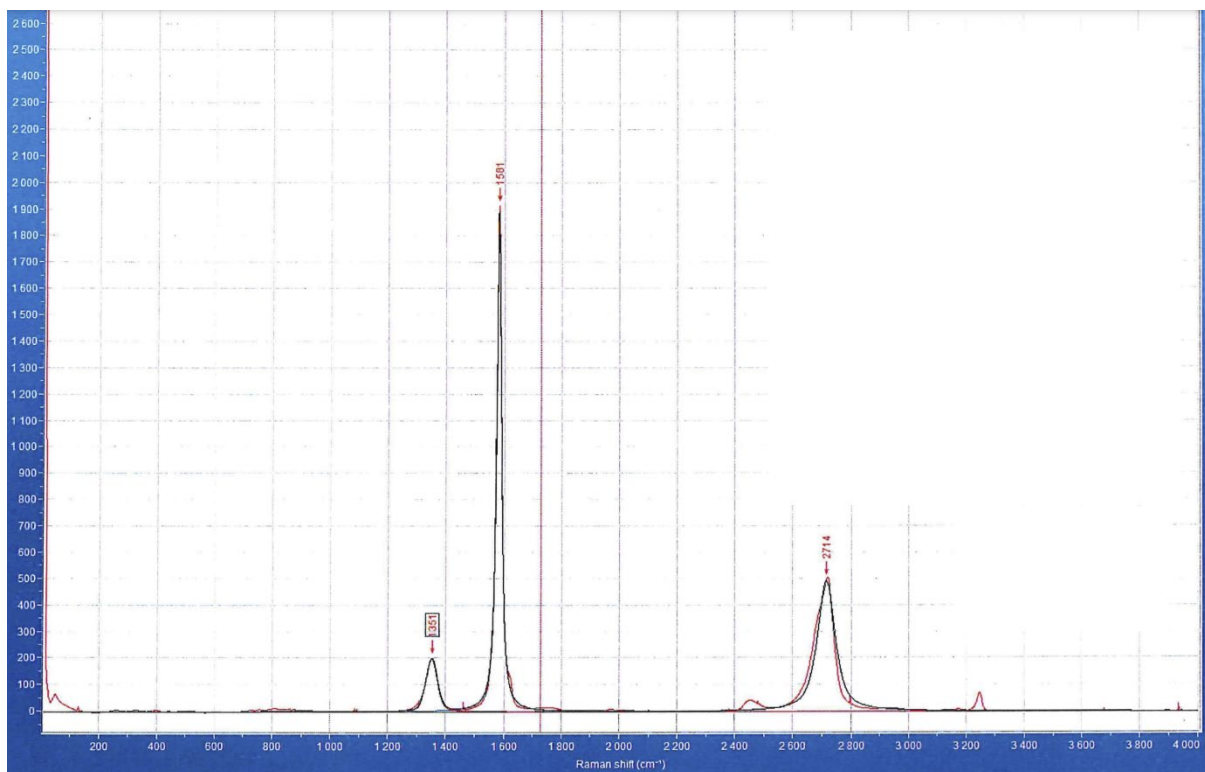

**Fig. S22.** Raman spectrum for 6\_GNP. Note: annotations intended for in-house use have been removed. We emphasise that it is only the annotations that were removed, the spectra themselves have not been altered in any way.

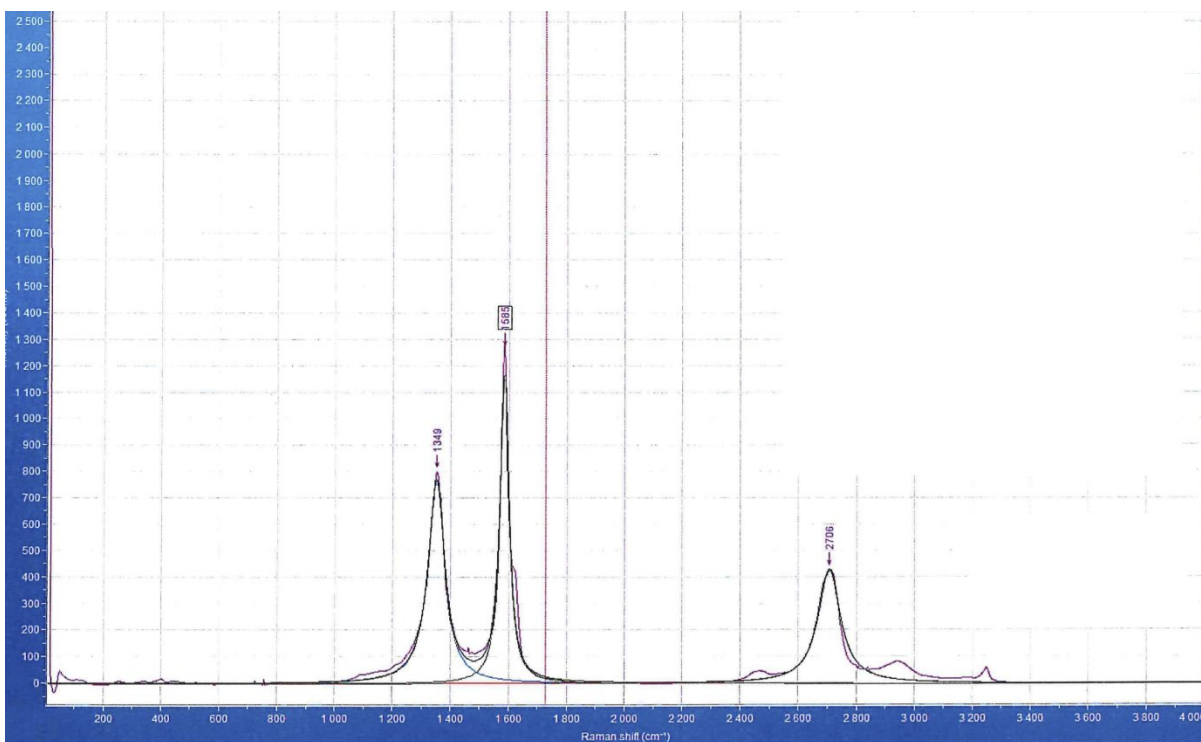

**Fig. S23.** Raman spectrum for 7\_GO. Note: annotations intended for in-house use have been removed. We emphasise that it is only the annotations that were removed, the spectra themselves have not been altered in any way.

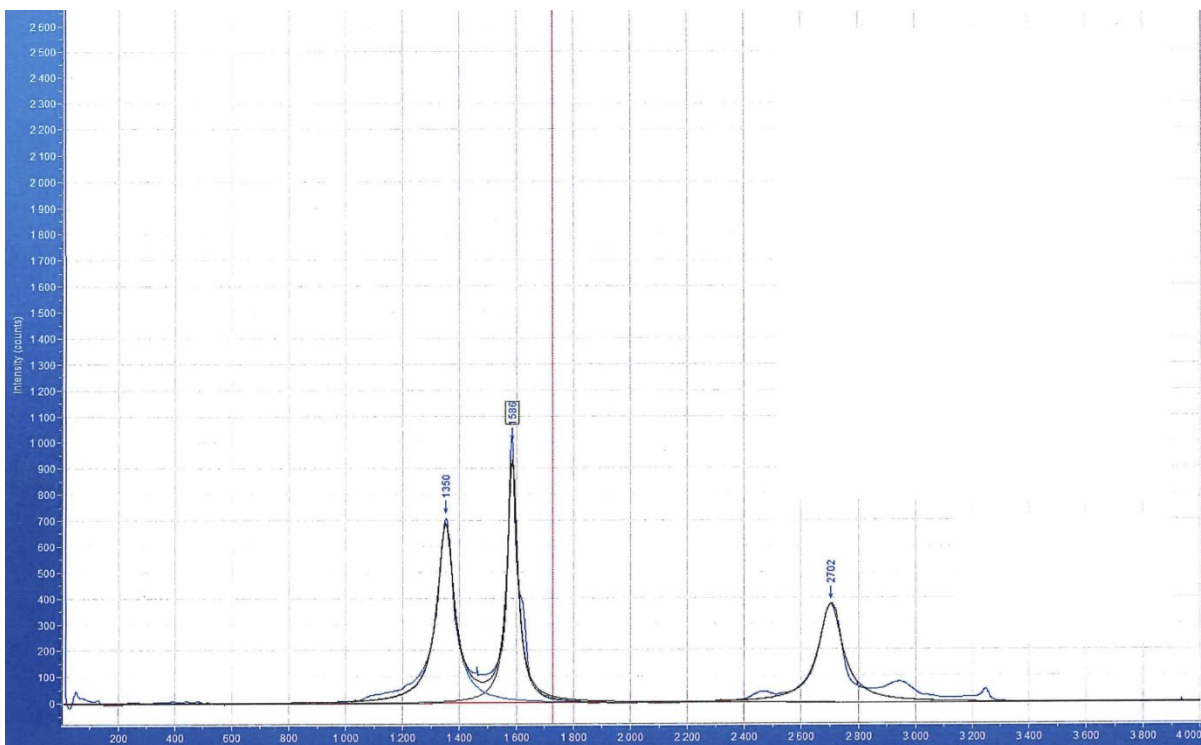

**Fig. S24.** Raman spectrum for 8\_rGO. Note: annotations intended for in-house use have been removed. We emphasise that it is only the annotations that were removed, the spectra themselves have not been altered in any way.

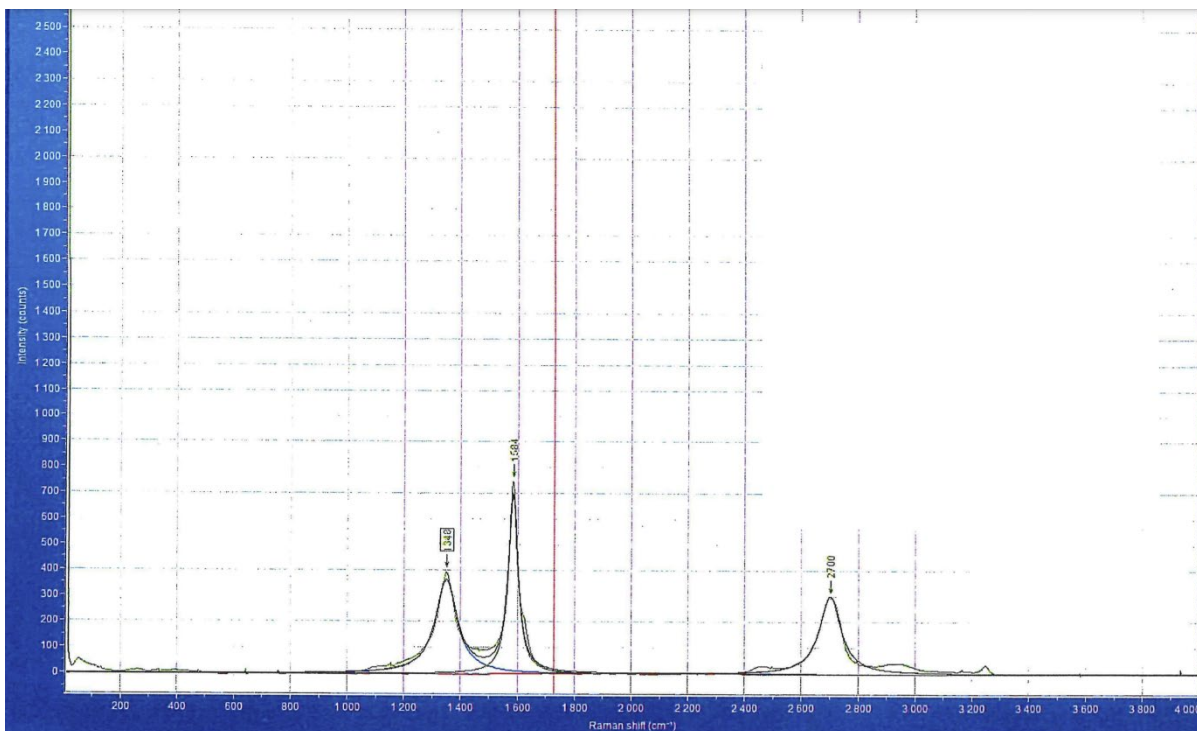

**Fig. S25.** Raman spectrum for 9\_GNP. Note: annotations intended for in-house use have been removed. We emphasise that it is only the annotations that were removed, the spectra themselves have not been altered in any way.

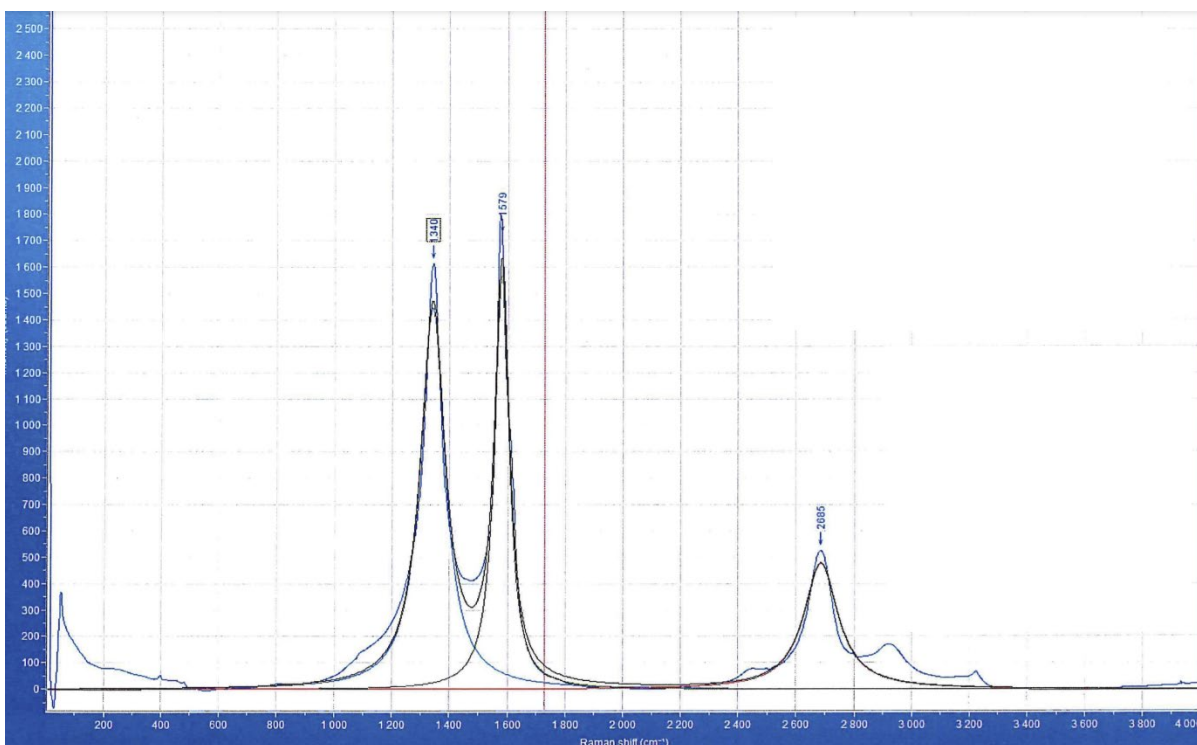

**Fig. S26.** Raman spectrum for 10\_GO. Note: annotations intended for in-house use have been removed. We emphasise that it is only the annotations that were removed, the spectra themselves have not been altered in any way.



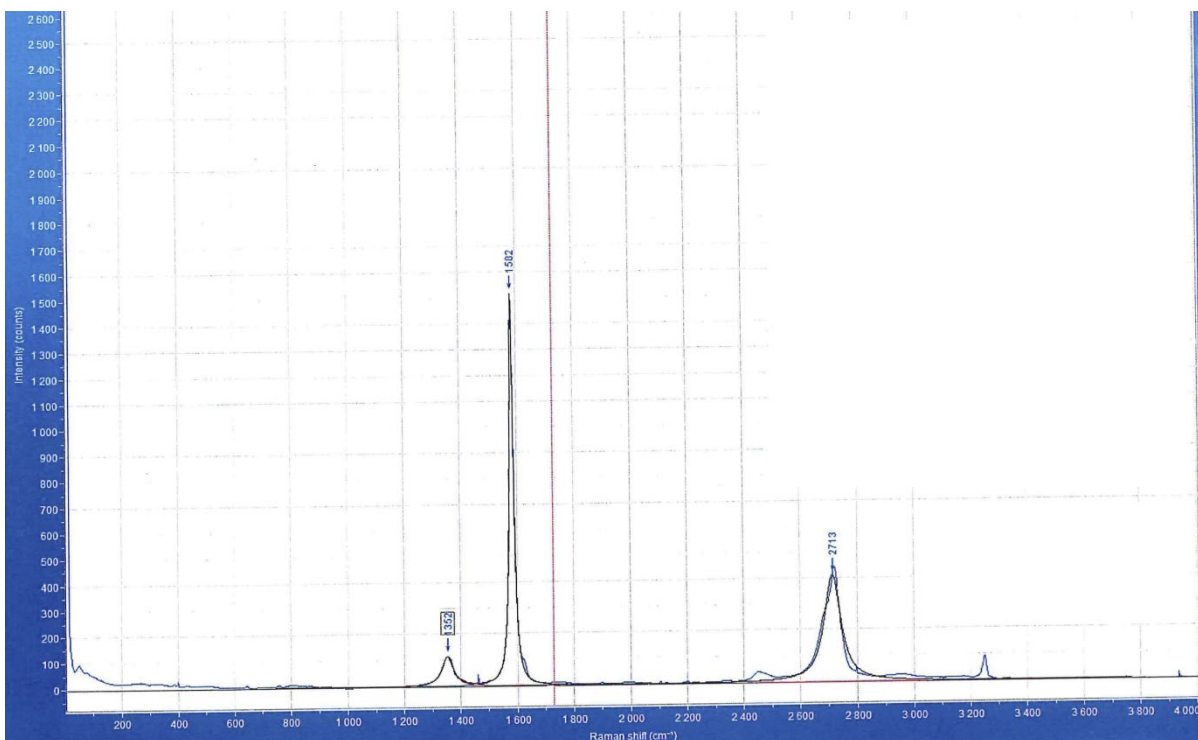

**Fig. S27.** Raman spectrum for 11\_GNP. Note: annotations intended for in-house use have been removed. We emphasise that it is only the annotations that were removed, the spectra themselves have not been altered in any way.

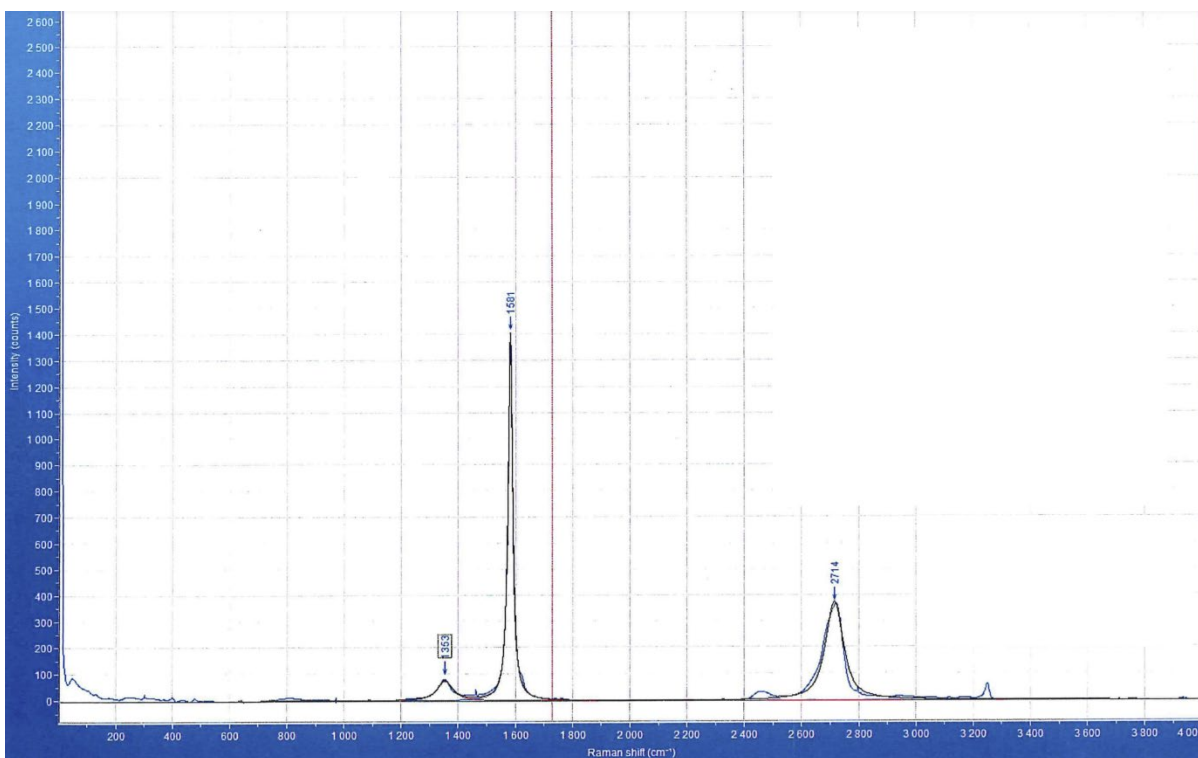

**Fig. S28.** Raman spectrum for 12\_GNP. Note: annotations intended for in-house use have been removed. We emphasise that it is only the annotations that were removed, the spectra themselves have not been altered in any way.

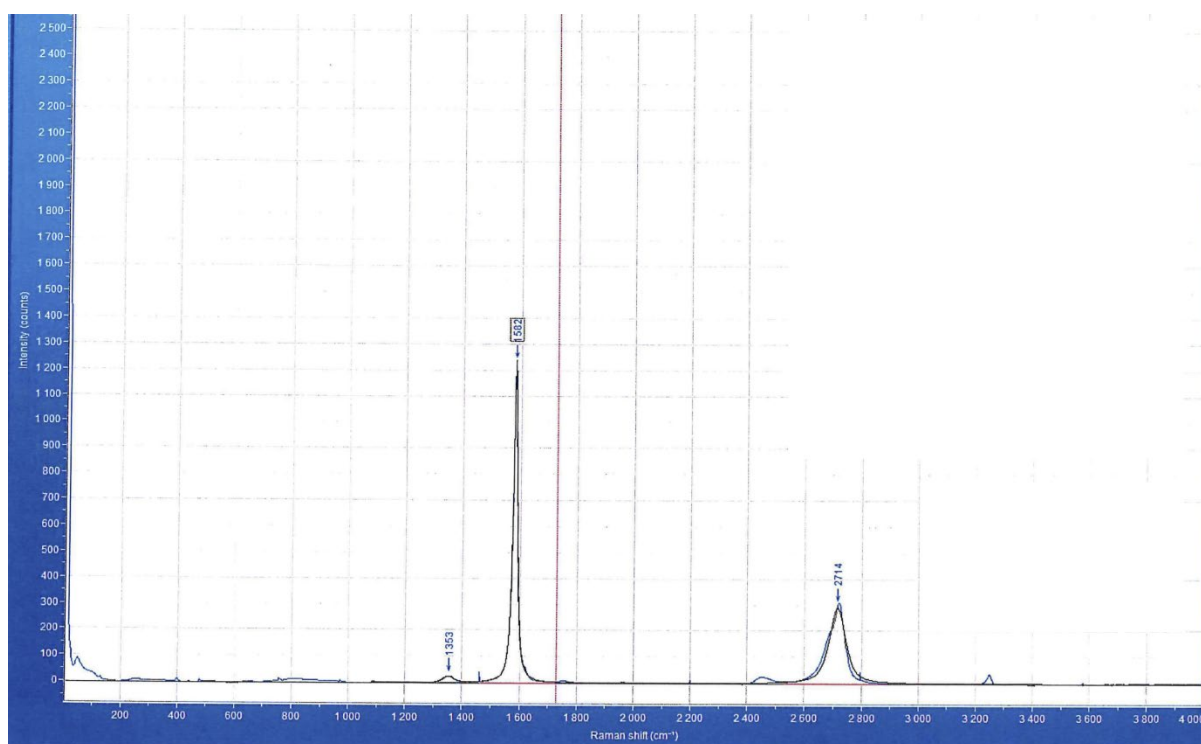

**Fig. S29.** Raman spectrum for 13\_GNP. Note: annotations intended for in-house use have been removed. We emphasise that it is only the annotations that were removed, the spectra themselves have not been altered in any way.



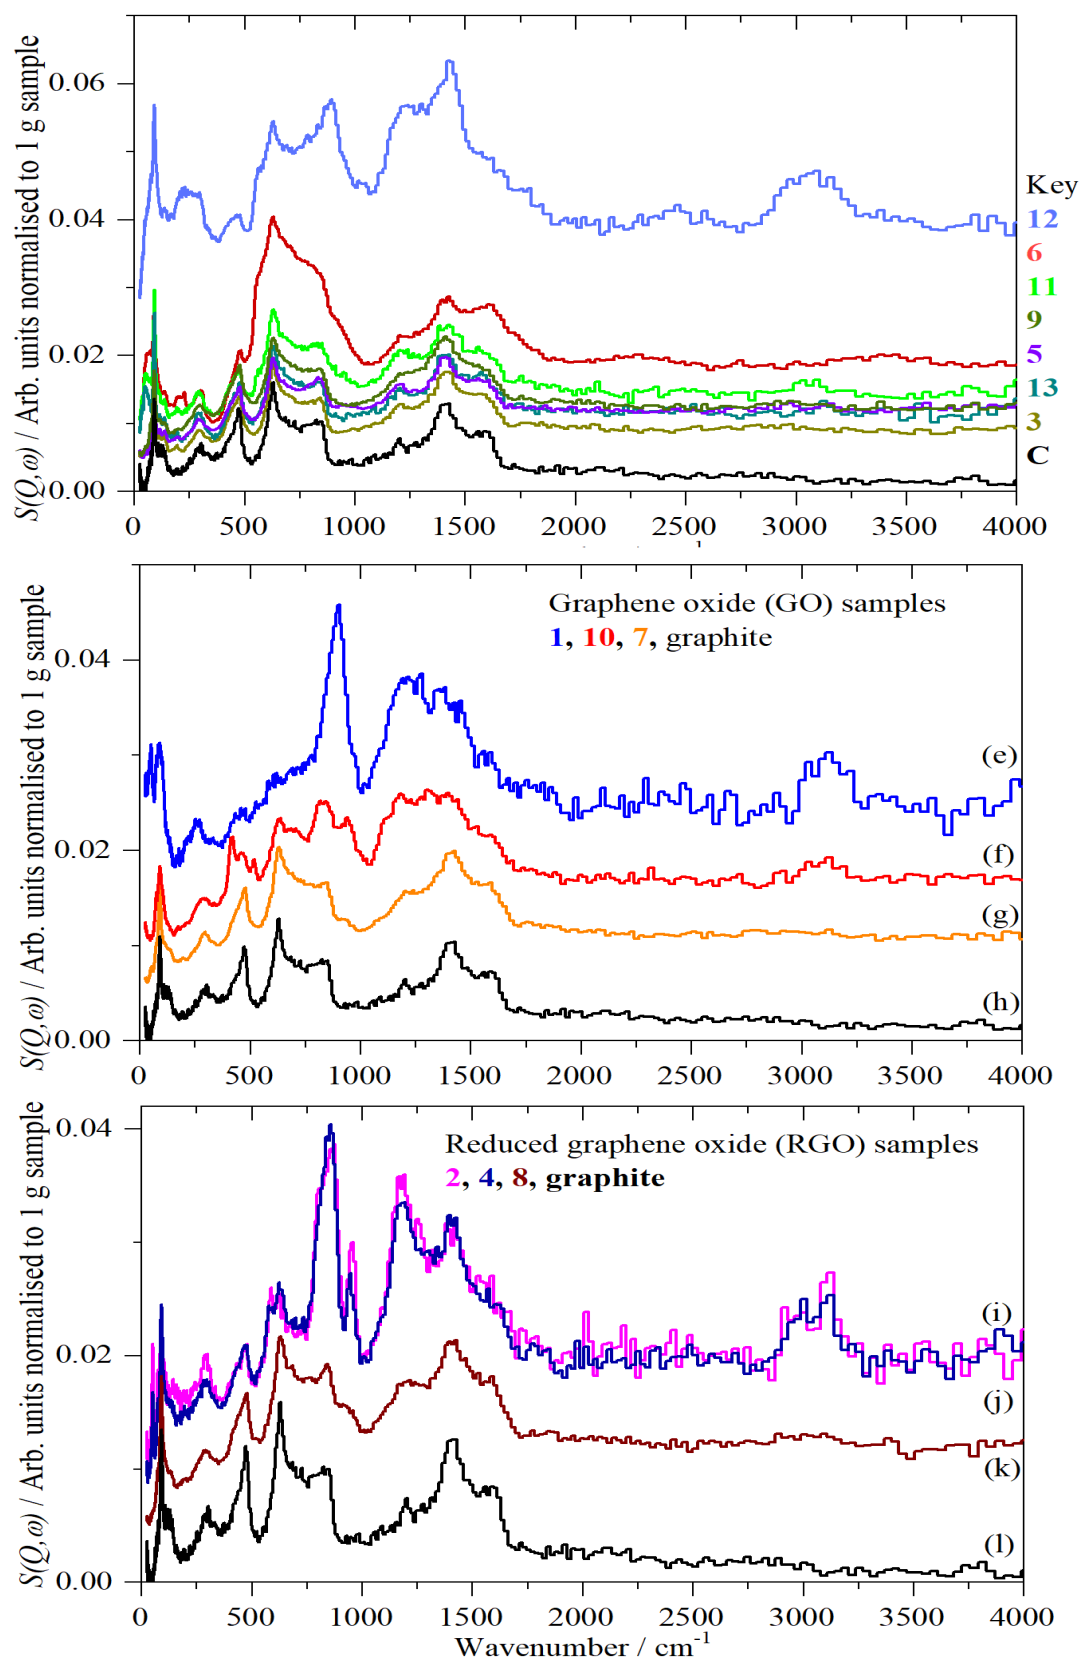

**Fig. S30.** Full range (0-4000  $\text{cm}^{-1}$ ) TOSCA INS spectra of the 2D carbon samples. In each panel the bottom-most spectrum is a reference spectrum of graphite. Top panel: graphene samples. Middle panel: graphene oxide samples. Bottom panel: reduced graphene oxide samples.

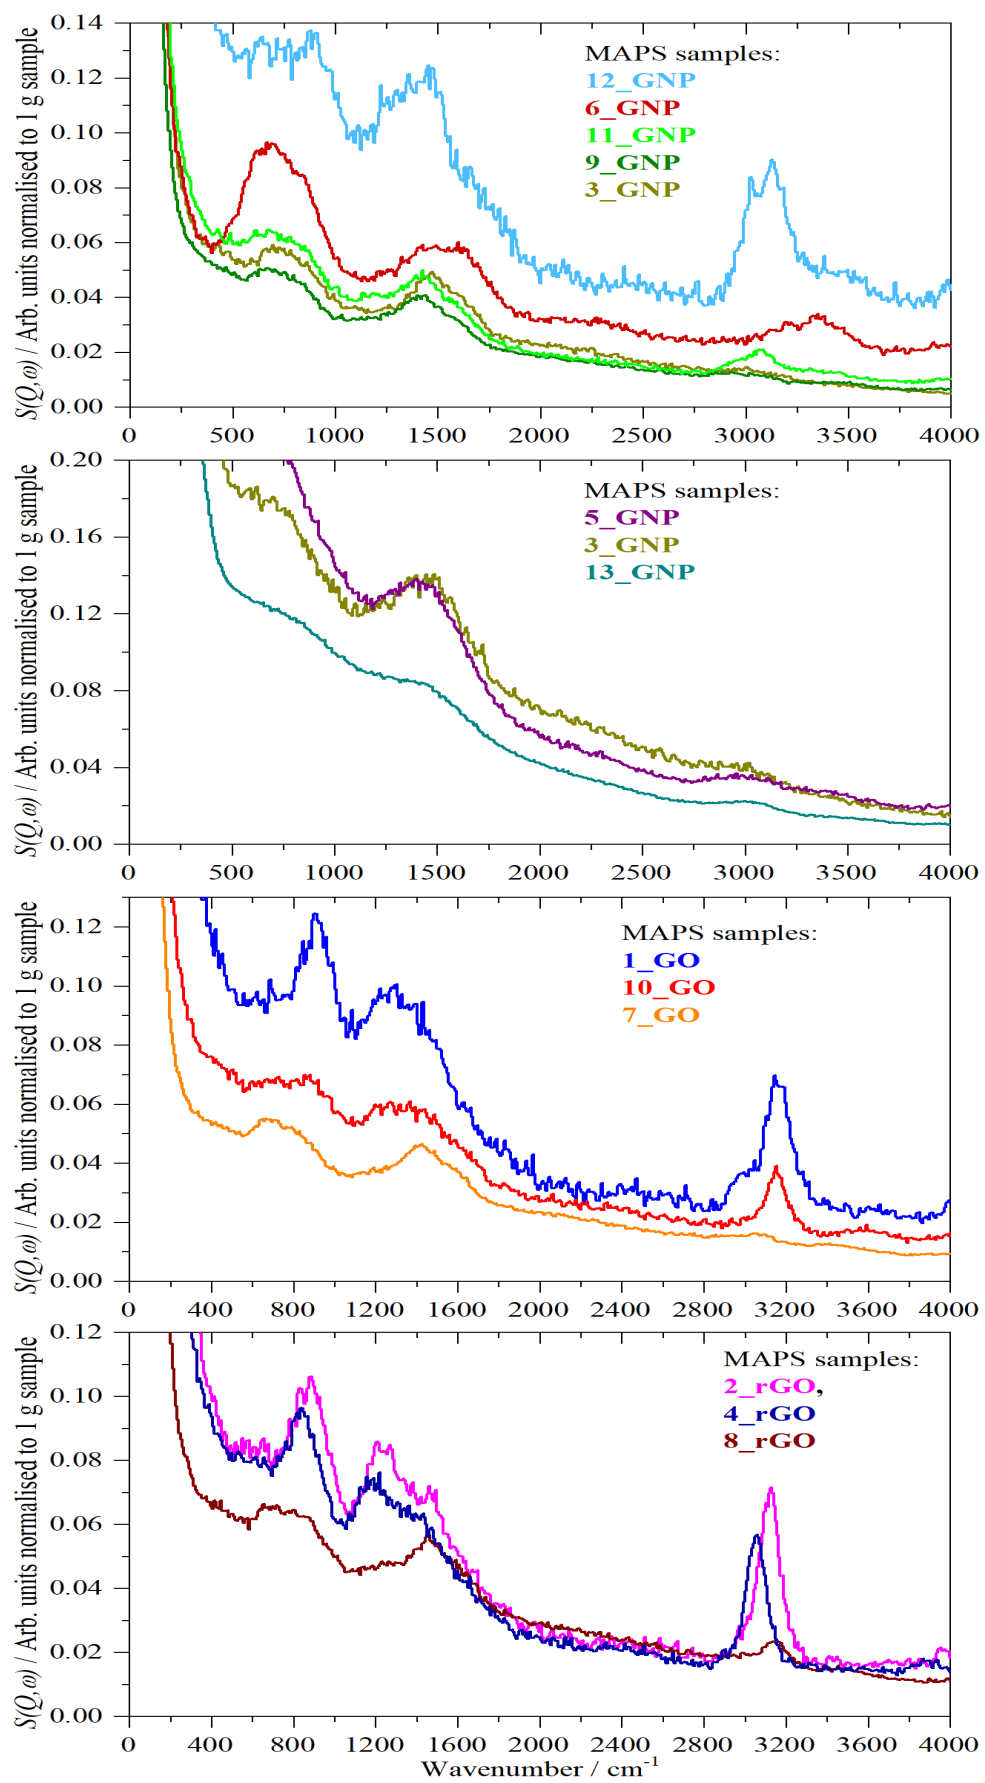

**Fig. S31.** MAPS INS spectra (0 – 4000  $\text{cm}^{-1}$ ) of the 2D carbon samples.

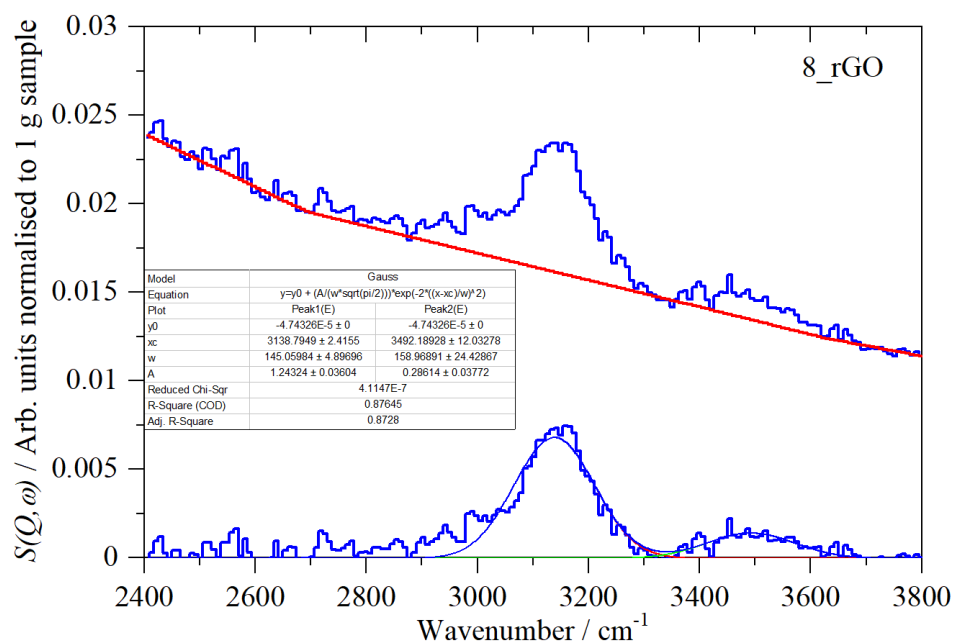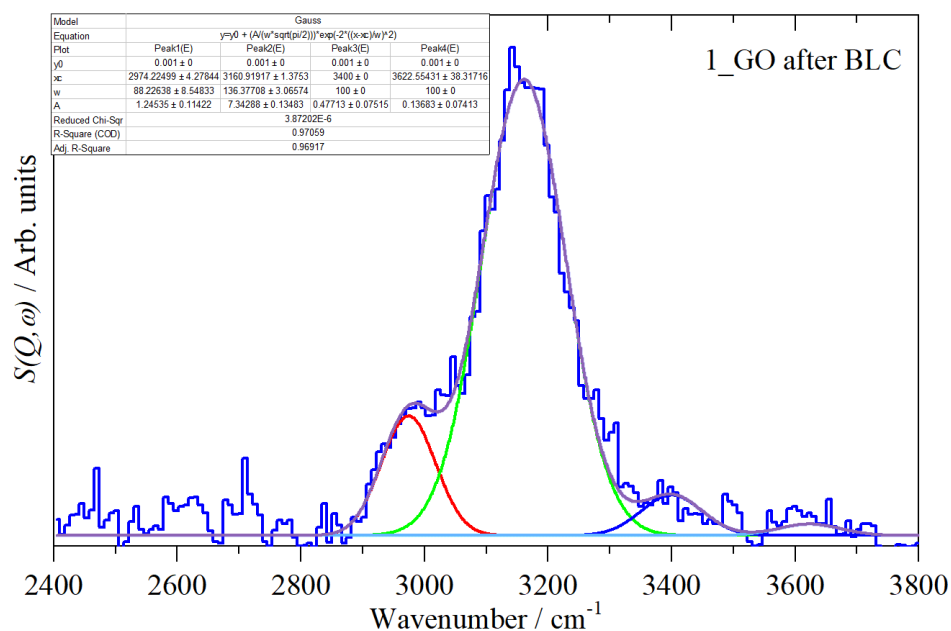

**Fig. S32.** Examples of curve fitting of the MAPS spectra in the C–H and O–H stretch region. The process first involves baseline correction (BLC) and then fitting to the minimum number of Gaussian functions. Top: 8\_rGO, bottom: 1\_GO.

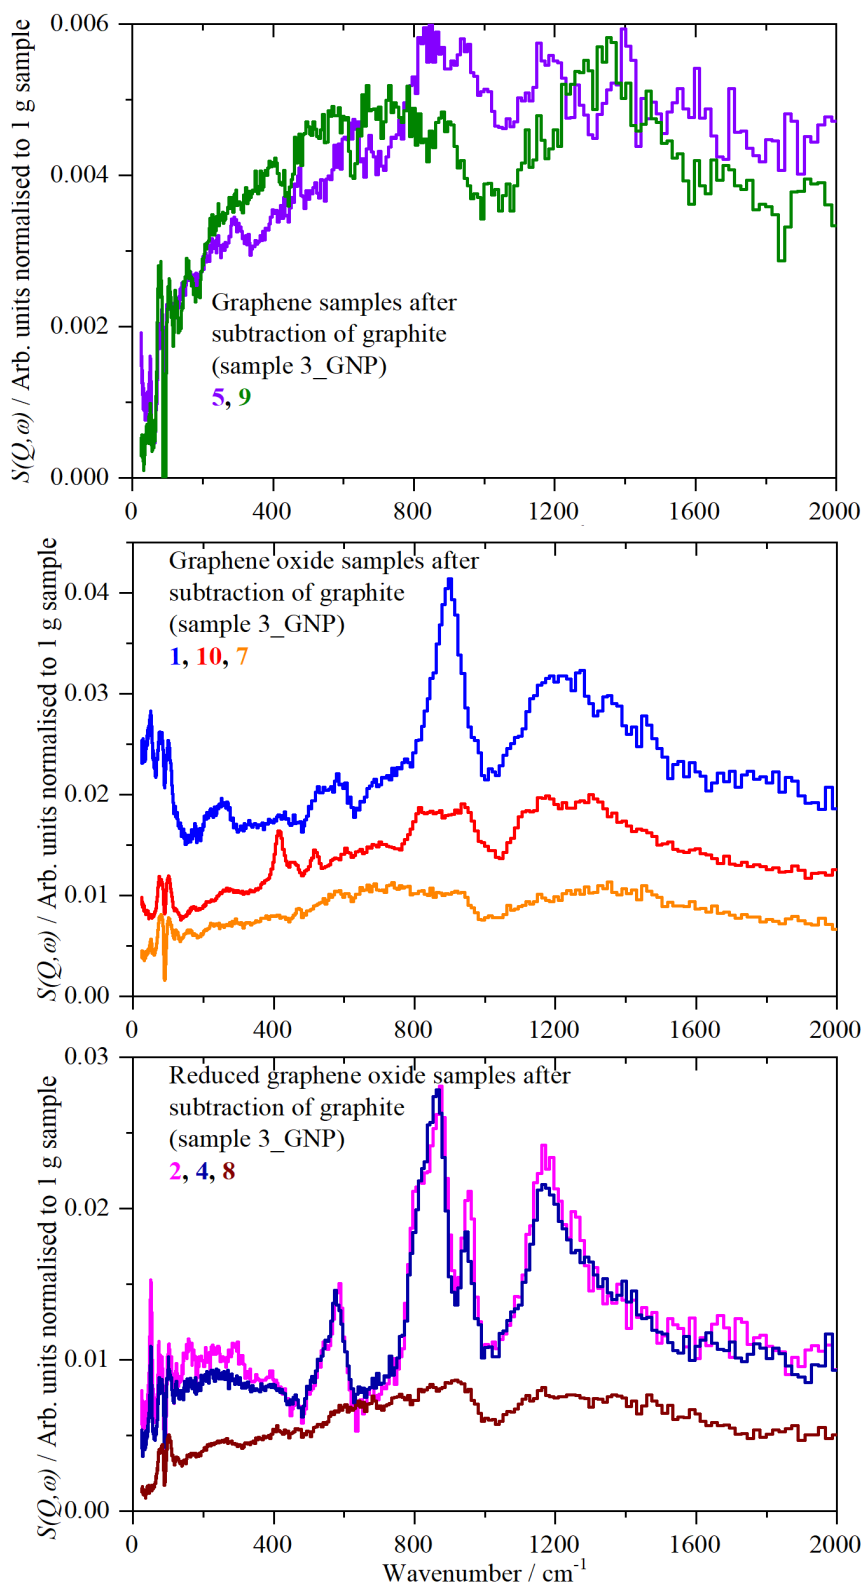

**Fig. S33.** TOSCA spectra of the 2D carbon samples after subtraction of the graphite contribution (3\_GNP), grouped by sample type. Top panel graphenes: a) 5\_GNP, b) 9\_GNP. Middle panel graphene oxides: c) 1\_GO, d) 10\_GO, e) 7\_GO ( $\times 2$  ordinate expanded). Bottom panel reduced graphene oxides: f) 2\_rGO, g) 4\_rGO, h) 8\_rGO. Note the different ordinate scales in the three panels.

**Table S3**Correlation of 90 cm<sup>-1</sup> feature in the INS spectra with the width of the XRD peak at 26.5° (001).

| Sample | Half-width of 2 $\theta$ signal (ca. 26.5°)<br>/ Degrees | 90 cm <sup>-1</sup> peak width<br>/ cm <sup>-1</sup> |
|--------|----------------------------------------------------------|------------------------------------------------------|
| 1_GO   | 4.85                                                     | 29.5                                                 |
| 2_rGO  | 4.25                                                     | 20.5                                                 |
| 3_GNP  | 0.749                                                    | 9.1                                                  |
| 4_rGO  | 1.306                                                    | 10                                                   |
| 5_GNP  | 0.381                                                    | 9.1                                                  |
| 6_GNP  | 0.506                                                    | 8.9                                                  |
| 7_GO   | 0.904                                                    | 7.6                                                  |
| 8_rGO  | 0.925                                                    | 7.6                                                  |
| 9_GNP  | 1.795                                                    | 10.7                                                 |
| 10_GO  | 1.613                                                    | 29.9                                                 |
| 11_GNP | 0.582                                                    | 8.1                                                  |
| 12_GNP | 0.536                                                    | 11.9                                                 |
| 13_GNP | 0.658                                                    | 8                                                    |

**Explanation of the 12 cm<sup>-1</sup> feature in Fig. 12a.**

The intense peak at 12 cm<sup>-1</sup> observed in the simulated INS spectrum of graphene (Fig. 12a) does not originate in interlayer motion, unlike the 90 cm<sup>-1</sup> peak in graphite. The conversion from the phonon density of states ( $G(\omega)$  which is what is calculated) to the experimentally observable  $S(Q, \omega)$  involves multiplication by  $1/\omega$  [2]. For a regular 3D material, the density of states of acoustic phonons at low energy roughly scales with frequency in a parabolic shape. This has the important implication that because the phonon DOS dies out faster than the  $1/\omega$  term can boost the INS intensity as  $\omega \rightarrow 0$ , the overall INS intensity converges to zero. For 2D graphene, however, its phonon DOS near zero frequency converges to a finite value due to the quadratic flexural mode (and the fact that we now have a 2D reciprocal space). As a result, we lose an important counter-balance to the  $1/\omega$  term and hence see the apparent divergence of intensity at low energy.

**References**

[1] P. Albers, A. Karl, J. Mathias, D. K. Ross, S. F. Parker, INS-, XPS- and SIMS-investigations on the controlled post-oxidation of pigment blacks – Detection of different species of strongly adsorbed water, *Carbon* 39 (2001) 1663-1676, [https://doi.org/10.1016/S0008-6223\(00\)00294-3](https://doi.org/10.1016/S0008-6223(00)00294-3).

[2] G. L. Squires, *Introduction to Thermal Neutron Scattering*, Dover, 1996, pp54-56.
